# Supplementary material for: Circulating tumor DNA for monitoring classic Hodgkin lymphoma patients: Correlation with FDG‐PET/CT
Source: PubMed Central journal article supplement — EJHaem. 2023 Nov 29;5(1):70–5. doi: 10.1002/jha2.826 (PMC10887323; doi:10.1002/jha2.826), 2023-11-29
Supplement: JHA2-5-70-s001.pdf [file JHA2-5-70-s001.pdf]

**Fernández S, et al. Circulating tumor DNA for monitoring classic Hodgkin lymphoma patients: correlation with FDG-PET/CT. Supplemental tables.**

**Supplemental Table 1**

| Clinical variable | Category | N  | Percentage |
|-------------------|----------|----|------------|
| Sex               | Male     | 30 | 65%        |
|                   | Female   | 16 | 35%        |
| Age               | <60      | 17 | 37%        |
|                   | >60      | 29 | 63%        |
| Histology         | LR       | 1  | 2%         |
|                   | MC       | 16 | 35%        |
|                   | NS       | 26 | 56%        |
|                   | NC       | 3  | 7%         |
| Stage             | I        | 0  | 0%         |
|                   | II       | 11 | 24%        |
|                   | III      | 10 | 22%        |
|                   | IV       | 25 | 54%        |
| B symptoms        | A        | 40 | 87%        |
|                   | B        | 6  | 13%        |
| IPS               | 0-2      | 16 | 35%        |
|                   | ≥ 3      | 28 | 61%        |
| Treatment         | ABVD     | 12 | 26%        |
|                   | BV       | 5  | 11%        |
|                   | BV-EPEM  | 29 | 63%        |
| Response          | CR       | 23 | 50%        |
|                   | PR       | 10 | 22%        |
|                   | PD       | 8  | 17%        |
|                   | NA       | 5  | 11%        |
| Current state     | Alive    | 34 | 74%        |
|                   | Exitus   | 12 | 26%        |

NC: Not-classified  
 NS: nodular sclerosis  
 MC: mixed cellularity  
 LR: lymphocyte rich  
 CR: complete response  
 PR: partial response  
 PD: progression disease  
 NA: not available

Supplemental Table 2

| GENE        | CODING                      | HL CASE#, VARIANT ALLELE FREQUENCY (%) |            |            |            |            |            |            |            |           |           |             |             |            | %     |
|-------------|-----------------------------|----------------------------------------|------------|------------|------------|------------|------------|------------|------------|-----------|-----------|-------------|-------------|------------|-------|
|             |                             | LH210010_1                             | LH210010_2 | LH200002_1 | LH200002_2 | LH210011_1 | LH210011_2 | LH200003_1 | LH200003_2 | C191819_1 | C191819_2 | LH1900001_1 | LH1900001_2 | LH210013_1 |       |
| ABL1        | c.3020C>T                   |                                        |            |            |            |            | NA         |            |            |           |           |             |             | NA         | 1,3%  |
| B2M         | c.347-1G>T                  |                                        |            |            |            |            |            |            |            |           |           |             |             |            | 2,6%  |
| B2M         | c.41_44delCTCT              |                                        |            |            |            |            |            |            |            |           |           |             |             |            | 1,3%  |
| B2M         | c.64C>T                     |                                        |            |            |            |            |            |            |            |           |           |             |             |            | 1,3%  |
| B2M         | c.67C>T                     |                                        |            |            |            |            |            |            |            |           |           |             |             |            | 1,3%  |
| B2M         | c.67+5G>C                   |                                        |            |            | 5,36       |            |            |            |            |           |           |             |             |            | 1,3%  |
| BCL10       | c.521T>A                    |                                        |            |            |            |            |            |            |            |           |           |             |             |            | 2,6%  |
| CARD11      | c.1017+99T>C                |                                        |            |            |            |            |            |            |            | 7,66      |           |             |             |            | 10,3% |
| CARD11      | c.1940+81G>A                |                                        |            |            |            |            |            |            |            |           |           |             |             |            | 2,6%  |
| CARD11      | c.1864_1866delITCC          |                                        |            |            |            |            |            |            |            |           |           |             |             |            | 1,3%  |
| CARD11      | c.1599_1600insT             |                                        |            |            |            |            |            |            |            |           |           |             |             |            | 1,3%  |
| CARD11      | c.3274C>T                   |                                        |            |            |            |            |            | 7,77       |            |           |           |             |             |            | 1,3%  |
| CASP8       | c.1357C>G                   |                                        |            |            |            |            |            |            |            |           |           |             |             |            | 2,6%  |
| CASP8       | c.151+3G>A                  |                                        |            |            |            |            |            |            |            |           |           |             |             |            | 2,6%  |
| CD19        | c.1267A>G                   |                                        |            |            |            |            |            | 6,10       |            |           |           |             |             |            | 1,3%  |
| CD38        | c.652A>T                    |                                        |            |            |            | 2,63       |            |            |            |           |           |             |             |            | 1,3%  |
| CREBBP      | c.6980C>T                   |                                        |            |            |            |            |            |            |            |           |           |             |             |            | 2,6%  |
| CREBBP      | c.6877C>T                   |                                        |            |            |            |            |            |            | 13,99      |           |           |             |             |            | 1,3%  |
| CREBBP      | c.5173-20T>C                |                                        |            |            |            |            |            |            | 11,41      |           |           |             |             |            | 1,3%  |
| CREBBP      | c.1573+11G>T                |                                        |            |            |            |            |            |            | 6,10       |           |           |             |             |            | 1,3%  |
| CSF1R       | c.241A>G                    |                                        |            |            |            |            |            |            |            |           |           |             |             |            | 2,6%  |
| CSF1R       | c.726_727insT               |                                        |            |            |            |            |            |            |            |           |           |             |             |            | 2,6%  |
| CSF1R       | c.2655-49C>T                |                                        |            |            |            |            |            |            |            |           |           |             |             |            | 1,3%  |
| CSF1R       | c.2113G>A                   |                                        |            |            |            |            |            |            |            |           |           |             |             |            | 1,3%  |
| CSF1R       | c.1626+3G>A                 |                                        |            |            |            |            |            |            |            |           |           |             |             |            | 1,3%  |
| CSF1R       | c.1969+85C>T                |                                        |            |            |            |            |            |            | 13,83      |           |           |             |             |            | 1,3%  |
| CSF1R       | c.1109G>A                   |                                        |            |            |            |            |            |            | 6,86       |           |           |             |             |            | 1,3%  |
| CSF2        | c.32C>T                     |                                        |            |            |            |            |            |            |            |           |           |             |             |            | 1,3%  |
| CSF2RB      | c.553G>A                    |                                        |            |            |            |            |            |            |            |           |           |             |             |            | 2,6%  |
| CSF2RB      | c.855-1G>T                  |                                        |            |            |            |            |            |            |            |           |           |             |             |            | 1,3%  |
| CSF2RB      | c.787G>A                    |                                        |            |            |            |            |            | 12,82      |            |           |           |             |             |            | 1,3%  |
| CSF2RB      | c.855-38C>T                 |                                        |            |            |            |            |            |            | 5,90       |           |           |             |             |            | 1,3%  |
| CSF2RB      | c.855-35C>T                 |                                        |            |            |            |            |            |            | 7,45       |           |           |             |             |            | 1,3%  |
| CYLD        | c.2678-18T>C                |                                        |            |            |            |            |            |            |            |           |           |             |             |            | 1,3%  |
| EP300       | c.3182_3183insA             |                                        |            |            |            |            |            |            |            |           |           |             |             |            | 11,5% |
| EP300       | c.4517delG                  |                                        |            |            |            |            |            |            |            |           |           |             |             |            | 5,1%  |
| EP300       | c.1529-20G>A                |                                        |            |            |            |            |            |            | 6,50       |           |           |             |             |            | 1,3%  |
| FAS         | c.677-19_677-18insT         |                                        |            |            |            |            |            |            |            |           |           |             |             |            | 3,8%  |
| FAS         | c.641_642insC               |                                        |            |            |            |            |            |            |            | 50,49     |           |             |             |            | 2,6%  |
| LCP1        | c.491+60T>C                 |                                        |            |            |            |            |            |            |            |           |           |             |             |            | 2,6%  |
| LCP1        | c.1172A>G                   |                                        |            |            |            | 3,54       |            |            |            |           |           |             |             |            | 1,3%  |
| LOC10012849 | c.2170A>G                   |                                        |            |            |            |            |            |            |            |           |           |             |             |            | 1,3%  |
| LOC10012849 | c.3061G>A                   |                                        |            |            |            |            |            | 6,05       |            |           |           |             |             |            | 1,3%  |
| LOC10012849 | c.2897C>T                   |                                        |            |            |            |            |            |            | 6,20       |           |           |             |             |            | 1,3%  |
| MYB         | c.545A>G                    |                                        |            |            |            |            |            |            |            | 4,60      |           |             |             |            | 9,0%  |
| MYB         | c.528-5T>C                  |                                        |            |            |            |            |            |            |            |           |           |             |             |            | 1,3%  |
| MYC         | c.593C>T                    |                                        |            |            |            |            |            |            | 8,50       |           |           |             |             |            | 1,3%  |
| NOTCH1      | c.6521A>G                   |                                        |            |            |            |            |            |            |            |           |           |             |             |            | 2,6%  |
| NOTCH1      | c.4348G>A                   |                                        |            |            |            |            |            |            |            |           |           |             |             |            | 2,6%  |
| NOTCH1      | c.383G>A                    |                                        |            |            |            |            |            |            |            |           |           |             |             |            | 1,3%  |
| NOTCH1      | c.1978G>A                   |                                        |            |            |            |            |            | 6,20       |            |           |           |             |             |            | 1,3%  |
| NOTCH1      | c.218C>T                    |                                        |            |            |            |            |            | 5,70       |            |           |           |             |             |            | 1,3%  |
| NOTCH1      | c.1477G>A                   |                                        |            |            |            |            |            |            | 9,81       |           |           |             |             |            | 1,3%  |
| NUMA1       | c.5654G>A                   |                                        |            |            |            |            |            |            | 7,54       |           |           |             |             |            | 1,3%  |
| PIK3CD      | c.931-9G>C                  |                                        |            |            |            |            |            |            |            |           |           |             |             |            | 7,7%  |
| PIK3CD      | c.931-14_931-13insC         |                                        |            |            |            |            |            |            |            |           |           |             |             |            | 5,1%  |
| PTPN1       | c.702+56delG                |                                        |            |            |            |            |            |            |            |           |           |             |             |            | 3,8%  |
| PTPN1       | c.1089-51C>T                |                                        |            |            |            |            |            |            | 7,20       |           |           |             |             |            | 1,3%  |
| REL         | c.133C>T                    |                                        |            |            |            |            |            |            | 7,10       |           |           |             |             |            | 1,3%  |
| RET         | c.2233C>T                   |                                        |            |            |            |            |            |            | 8,65       |           |           |             |             |            | 1,3%  |
| SH3BP5      | c.330+47C>A                 |                                        |            |            |            |            |            |            |            |           |           |             |             |            | 2,6%  |
| SH3BP5      | c.330+47_330+48insA         |                                        |            |            |            |            |            |            |            |           |           |             |             |            | 1,3%  |
| SH3BP5,SH3B | c.1174A>G                   |                                        |            |            |            |            |            |            |            |           |           |             |             |            | 2,6%  |
| SMARCA4     | c.1119-12C>T                |                                        |            |            |            |            |            |            |            |           |           |             |             |            | 2,6%  |
| SMARCA4     | c.577G>A                    |                                        |            |            |            |            |            |            |            |           |           |             |             |            | 1,3%  |
| SMARCA4     | c.2974G>A                   |                                        |            |            |            |            |            |            |            |           |           |             |             |            | 1,3%  |
| SMARCA4     | c.3598C>T                   |                                        |            |            |            |            |            | 6,65       |            |           |           |             |             |            | 1,3%  |
| SOCS1       | c.307_321delGTGCGCGACAGCCGC |                                        |            |            |            | 3,37       |            |            |            |           |           |             |             |            | 1,3%  |
| STAT3       | c.332A>G                    |                                        |            |            |            |            |            |            |            |           |           |             |             |            | 1,3%  |
| STAT6       | c.910delG                   |                                        |            |            |            |            |            |            |            |           |           |             |             |            | 10,3% |
| STAT6       | c.256-4G>A                  |                                        |            |            |            |            |            |            |            |           |           |             |             |            | 2,6%  |
| STAT6       | c.940G>A                    |                                        |            |            | 44,70      | 42,03      |            |            |            |           |           |             |             |            | 2,6%  |
| STAT6       | c.1513-20C>T                |                                        |            |            |            |            |            |            |            |           |           |             |             |            | 1,3%  |
| STAT6       | c.1876C>T                   |                                        |            |            |            |            |            |            | 8,15       |           |           |             |             |            | 1,3%  |
| STAT6       | c.681-7G>A                  |                                        |            |            |            |            |            |            | 10,57      |           |           |             |             |            | 1,3%  |
| TNFAIP3     | c.1018_1021delAATC          |                                        |            |            |            |            |            |            |            |           |           |             |             |            | 2,6%  |
| TNFAIP3     | c.131A>T                    |                                        |            |            |            |            |            |            |            |           |           |             |             |            | 2,6%  |
| TNFAIP3     | c.487-11G>T                 |                                        |            |            |            |            |            |            |            |           |           |             |             |            | 2,6%  |
| TNFAIP3     | c.1343G>A                   |                                        |            |            |            |            |            |            |            |           |           |             |             |            | 1,3%  |
| TP53        | c.215C>G                    |                                        |            |            |            |            |            |            |            |           |           |             |             |            | 6,4%  |
| TP53        | c.97-6C>T                   |                                        |            |            |            |            |            |            |            |           |           |             |             |            | 5,1%  |
| TP53        | c.97-52G>A                  |                                        |            |            |            |            |            |            |            |           |           |             |             |            | 2,6%  |
| TP53        | c.524G>A                    |                                        |            |            |            |            |            |            |            |           |           |             |             |            | 2,6%  |
| TP53        | c.473G>A                    |                                        |            |            |            |            |            |            |            |           |           |             |             |            | 1,3%  |
| TP53        | c.818G>C                    |                                        |            |            |            |            |            |            |            |           |           |             |             |            | 1,3%  |
|             | SNVs                        | 0                                      | 0          | 1          | 2          | 3          | NA         | 5          | 19         | 3         | 0         | 0           | 0           | NA         |       |

| GENE        | CODING                     |            |            |            |            |            |            |                     |            |            |           | %     |
|-------------|----------------------------|------------|------------|------------|------------|------------|------------|---------------------|------------|------------|-----------|-------|
|             |                            | LH210013_2 | LH210014_1 | LH210014_2 | LH210012_1 | LH210012_2 | LH200004_1 | LH200004_2          | LH200005_1 | LH200005_2 | C212118_1 |       |
| ABL1        | c.3020C>T                  |            | NA         | NA         | NA         | NA         |            |                     |            |            | NA        | 1,3%  |
| B2M         | c.347-1G>T                 |            |            |            |            |            |            |                     |            |            |           | 2,6%  |
| B2M         | c.41_44delCT               | 7.28       |            |            |            |            |            |                     |            |            |           | 1,3%  |
| B2M         | c.64C>T                    | 6.95       |            |            |            |            |            |                     |            |            |           | 1,3%  |
| B2M         | c.67C>T                    | 7.20       |            |            |            |            |            |                     |            |            |           | 1,3%  |
| B2M         | c.67+5G>C                  |            |            |            |            |            |            |                     |            |            |           | 1,3%  |
| BCL10       | c.521T>A                   |            |            |            |            |            |            |                     |            |            |           | 2,6%  |
| CARD11      | c.1017+99T>C               |            |            |            |            |            |            |                     |            |            |           | 10,3% |
| CARD11      | c.1940+81G>A               |            |            |            |            |            |            |                     |            |            |           | 2,6%  |
| CARD11      | c.1864_1866delTCC          |            |            |            |            |            |            |                     |            |            |           | 1,3%  |
| CARD11      | c.1599_1600insT            |            |            |            |            |            |            |                     |            |            |           | 1,3%  |
| CARD11      | c.3274C>T                  |            |            |            |            |            |            |                     |            |            |           | 1,3%  |
| CASP8       | c.1357C>G                  |            |            |            |            |            |            |                     |            |            |           | 2,6%  |
| CASP8       | c.151+3G>A                 |            |            |            |            |            |            |                     |            |            |           | 2,6%  |
| CD19        | c.1267A>G                  |            |            |            |            |            |            |                     |            |            |           | 1,3%  |
| CD38        | c.652A>T                   |            |            |            |            |            |            |                     |            |            |           | 1,3%  |
| CREBBP      | c.6980C>T                  |            |            |            |            |            |            |                     |            |            |           | 2,6%  |
| CREBBP      | c.6877C>T                  |            |            |            |            |            |            |                     |            |            |           | 1,3%  |
| CREBBP      | c.5173-20T>C               |            |            |            |            |            |            |                     |            |            |           | 1,3%  |
| CREBBP      | c.1573+11G>T               |            |            |            |            |            |            |                     |            |            |           | 1,3%  |
| CSF1R       | c.241A>G                   |            |            |            |            |            |            |                     |            |            |           | 2,6%  |
| CSF1R       | c.726_727insT              |            |            |            |            |            |            |                     |            |            |           | 2,6%  |
| CSF1R       | c.2655-49C>T               |            |            |            |            |            |            |                     |            |            |           | 1,3%  |
| CSF1R       | c.2113G>A                  |            |            |            |            |            |            |                     |            |            |           | 1,3%  |
| CSF1R       | c.1626+3G>A                |            |            |            |            |            |            |                     |            |            |           | 1,3%  |
| CSF1R       | c.1969+85C>T               |            |            |            |            |            |            |                     |            |            |           | 1,3%  |
| CSF1R       | c.1109G>A                  |            |            |            |            |            |            |                     |            |            |           | 1,3%  |
| CSF2        | c.32C>T                    |            |            |            |            |            |            |                     |            |            |           | 1,3%  |
| CSF2RB      | c.553G>A                   |            |            |            |            |            |            |                     |            |            |           | 2,6%  |
| CSF2RB      | c.855-1G>T                 |            |            |            |            |            |            |                     |            |            |           | 1,3%  |
| CSF2RB      | c.787G>A                   |            |            |            |            |            |            |                     |            |            |           | 1,3%  |
| CSF2RB      | c.855-38C>T                |            |            |            |            |            |            |                     |            |            |           | 1,3%  |
| CSF2RB      | c.855-35C>T                |            |            |            |            |            |            |                     |            |            |           | 1,3%  |
| CYLD        | c.2678-18T>C               |            |            |            |            |            |            |                     |            |            |           | 1,3%  |
| EP300       | c.3182_3183insA            |            |            |            |            |            |            |                     |            |            |           | 11,5% |
| EP300       | c.4517delG                 | 44.54      |            |            |            |            |            |                     |            |            |           | 5,1%  |
| EP300       | c.1529-20G>A               |            |            |            |            |            |            |                     |            |            |           | 1,3%  |
| FAS         | c.677-19_677-18insT        |            |            |            |            |            |            |                     |            |            |           | 3,8%  |
| FAS         | c.641_642insC              |            |            |            |            |            |            |                     |            |            |           | 2,6%  |
| LCP1        | c.491+60T>C                |            |            |            |            |            |            |                     |            |            |           | 2,6%  |
| LCP1        | c.1172A>G                  |            |            |            |            |            |            |                     |            |            |           | 1,3%  |
| LOC10012849 | c.2170A>G                  |            |            |            |            |            |            |                     |            |            |           | 1,3%  |
| LOC10012849 | c.3061G>A                  |            |            |            |            |            |            |                     |            |            |           | 1,3%  |
| LOC10012849 | c.2897C>T                  |            |            |            |            |            |            |                     |            |            |           | 1,3%  |
| MYB         | c.545A>G                   |            |            |            |            |            |            |                     |            |            |           | 9,0%  |
| MYB         | c.528-5T>C                 |            |            |            |            |            |            |                     |            |            |           | 1,3%  |
| MYC         | c.593C>T                   |            |            |            |            |            |            |                     |            |            |           | 1,3%  |
| NOTCH1      | c.6521A>G                  |            |            |            |            |            |            |                     |            |            |           | 2,6%  |
| NOTCH1      | c.4348G>A                  |            |            |            |            |            |            |                     |            |            |           | 2,6%  |
| NOTCH1      | c.383G>A                   |            |            |            |            |            |            |                     |            |            |           | 1,3%  |
| NOTCH1      | c.1978G>A                  |            |            |            |            |            |            |                     |            |            |           | 1,3%  |
| NOTCH1      | c.218C>T                   |            |            |            |            |            |            |                     |            |            |           | 1,3%  |
| NOTCH1      | c.1477G>A                  |            |            |            |            |            |            |                     |            |            |           | 1,3%  |
| NUMA1       | c.5654G>A                  |            |            |            |            |            |            |                     |            |            |           | 1,3%  |
| PIK3CD      | c.931-9G>C                 |            |            |            |            |            |            |                     |            |            |           | 7,7%  |
| PIK3CD      | c.931-14_931-13insC        |            |            |            |            |            | 47.42      |                     |            |            |           | 5,1%  |
| PTPN1       | c.702+56delG               |            |            |            |            |            |            |                     |            |            |           | 3,8%  |
| PTPN1       | c.1089-51C>T               |            |            |            |            |            |            |                     |            |            |           | 1,3%  |
| REL         | c.133C>T                   |            |            |            |            |            |            |                     |            |            |           | 1,3%  |
| RET         | c.2233C>T                  |            |            |            |            |            |            |                     |            |            |           | 1,3%  |
| SH3BP5      | c.330+47C>A                |            |            |            |            |            |            |                     |            |            |           | 2,6%  |
| SH3BP5      | c.330+47_330+48insA        |            |            |            |            |            |            |                     |            |            |           | 1,3%  |
| SH3BP5,SH3B | c.1174A>G                  |            |            |            |            |            |            |                     |            |            |           | 2,6%  |
| SMARCA4     | c.1119-12C>T               |            |            |            |            |            |            |                     |            |            |           | 2,6%  |
| SMARCA4     | c.577G>A                   |            |            |            |            |            |            |                     |            |            |           | 1,3%  |
| SMARCA4     | c.2974G>A                  |            |            |            |            |            |            |                     |            |            |           | 1,3%  |
| SMARCA4     | c.3598C>T                  |            |            |            |            |            |            |                     |            |            |           | 1,3%  |
| SOCS1       | c.307_321delGTGCGGACAGCCGC |            |            |            |            |            |            |                     |            |            |           | 1,3%  |
| STAT3       | c.332A>G                   |            |            |            |            |            |            |                     |            |            |           | 1,3%  |
| STAT6       | c.910delG                  |            |            |            |            |            | 44.99      |                     |            |            |           | 10,3% |
| STAT6       | c.256-4G>A                 |            |            |            |            |            |            |                     |            |            |           | 2,6%  |
| STAT6       | c.940G>A                   |            |            |            |            |            |            |                     |            |            |           | 2,6%  |
| STAT6       | c.1513-20C>T               |            |            |            |            |            |            |                     |            |            |           | 1,3%  |
| STAT6       | c.1876C>T                  |            |            |            |            |            |            |                     |            |            |           | 1,3%  |
| STAT6       | c.681-7G>A                 |            |            |            |            |            |            |                     |            |            |           | 1,3%  |
| TNFAIP3     | c.1018_1021delAATC         |            |            |            |            |            |            |                     |            |            |           | 2,6%  |
| TNFAIP3     | c.131A>T                   |            |            |            |            |            |            |                     |            |            |           | 2,6%  |
| TNFAIP3     | c.487-11G>T                |            |            |            |            |            |            |                     |            |            |           | 2,6%  |
| TNFAIP3     | c.1343G>A                  | 10.95      |            |            |            |            |            |                     |            |            |           | 1,3%  |
| TP53        | c.215C>G                   |            |            |            |            |            |            | CAC=1.29, CGC=43.41 |            |            |           | 6,4%  |
| TP53        | c.97-6C>T                  |            |            |            |            |            |            |                     |            |            |           | 5,1%  |
| TP53        | c.97-52G>A                 |            |            |            |            |            |            |                     |            |            |           | 2,6%  |
| TP53        | c.524G>A                   |            |            |            |            |            |            |                     |            |            |           | 2,6%  |
| TP53        | c.473G>A                   |            |            |            |            |            |            |                     |            |            |           | 1,3%  |
| TP53        | c.818G>C                   | 20.27      |            |            |            |            |            |                     |            |            |           | 1,3%  |
|             | SNVs                       | 6          | NA         | NA         | NA         | NA         | 2          | 0                   | 1          | 0          | NA        |       |

| GENE        | CODING                     | NA        |            |            |            |            |           |           |            |            |            | % |            |       |
|-------------|----------------------------|-----------|------------|------------|------------|------------|-----------|-----------|------------|------------|------------|---|------------|-------|
|             |                            | C212118_2 | LH220015_1 | LH220015_2 | LH220016_1 | LH220016_2 | C222201_1 | C222201_2 | LH230118_1 | LH230118_2 | LH230119_1 |   | LH230119_2 |       |
| ABL1        | c.3020C>T                  |           |            |            |            |            |           |           |            |            |            |   |            | 1,3%  |
| B2M         | c.347-1G>T                 |           |            |            |            |            |           |           |            |            |            |   |            | 2,6%  |
| B2M         | c.41_44delCTCT             |           |            |            |            |            |           |           |            |            |            |   |            | 1,3%  |
| B2M         | c.64C>T                    |           |            |            |            |            |           |           |            |            |            |   |            | 1,3%  |
| B2M         | c.67C>T                    |           |            |            |            |            |           |           |            |            |            |   |            | 1,3%  |
| B2M         | c.67+5G>C                  |           |            |            |            |            |           |           |            |            |            |   |            | 1,3%  |
| BCL10       | c.521T>A                   |           |            |            |            |            |           |           |            |            |            |   |            | 2,6%  |
| CARD11      | c.1017+99T>C               |           |            |            |            |            |           |           |            |            |            |   |            | 10,3% |
| CARD11      | c.1940+81G>A               |           |            |            |            |            |           |           |            |            |            |   |            | 2,6%  |
| CARD11      | c.1864_1866delTCC          |           |            |            |            |            |           |           |            |            |            |   |            | 1,3%  |
| CARD11      | c.1599_1600insT            |           |            |            |            |            |           |           |            |            |            |   |            | 1,3%  |
| CARD11      | c.3274C>T                  |           |            |            |            |            |           |           |            |            |            |   |            | 1,3%  |
| CASP8       | c.1357C>G                  |           |            |            |            |            |           |           |            |            |            |   |            | 2,6%  |
| CASP8       | c.151+3G>A                 |           |            |            |            |            |           |           |            |            |            |   |            | 2,6%  |
| CD19        | c.1267A>G                  |           |            |            |            |            |           |           |            |            |            |   |            | 1,3%  |
| CD38        | c.652A>T                   |           |            |            |            |            |           |           |            |            |            |   |            | 1,3%  |
| CREBBP      | c.6980C>T                  |           |            |            |            |            |           |           |            |            |            |   |            | 2,6%  |
| CREBBP      | c.6877C>T                  |           |            |            |            |            |           |           |            |            |            |   |            | 1,3%  |
| CREBBP      | c.5173-20T>C               |           |            |            |            |            |           |           |            |            |            |   |            | 1,3%  |
| CREBBP      | c.1573+11G>T               |           |            |            |            |            |           |           |            |            |            |   |            | 1,3%  |
| CSF1R       | c.241A>G                   |           |            |            |            |            |           |           |            |            |            |   |            | 2,6%  |
| CSF1R       | c.726_727insT              |           |            |            | 53.26      |            |           |           |            |            |            |   |            | 2,6%  |
| CSF1R       | c.2655-49C>T               |           |            |            |            |            |           |           |            |            |            |   |            | 1,3%  |
| CSF1R       | c.2113G>A                  |           |            |            |            |            |           |           |            |            |            |   |            | 1,3%  |
| CSF1R       | c.1626+3G>A                |           |            |            |            |            |           |           |            |            |            |   |            | 1,3%  |
| CSF1R       | c.1969+85C>T               |           |            |            |            |            |           |           |            |            |            |   |            | 1,3%  |
| CSF1R       | c.1109G>A                  |           |            |            |            |            |           |           |            |            |            |   |            | 1,3%  |
| CSF2        | c.32C>T                    |           |            |            |            |            |           |           |            |            |            |   |            | 1,3%  |
| CSF2RB      | c.553G>A                   |           |            |            |            |            |           |           |            |            |            |   |            | 2,6%  |
| CSF2RB      | c.855-1G>T                 |           |            |            |            |            |           |           |            |            |            |   |            | 1,3%  |
| CSF2RB      | c.787G>A                   |           |            |            |            |            |           |           |            |            |            |   |            | 1,3%  |
| CSF2RB      | c.855-38C>T                |           |            |            |            |            |           |           |            |            |            |   |            | 1,3%  |
| CSF2RB      | c.855-35C>T                |           |            |            |            |            |           |           |            |            |            |   |            | 1,3%  |
| CYLD        | c.2678-18T>C               |           |            |            |            |            |           |           |            |            |            |   |            | 1,3%  |
| EP300       | c.3182_3183insA            |           |            |            |            |            |           |           |            |            |            |   |            | 11,5% |
| EP300       | c.4517delG                 |           |            |            |            |            |           |           |            |            |            |   |            | 5,1%  |
| EP300       | c.1529-20G>A               |           |            |            |            |            |           |           |            |            |            |   |            | 1,3%  |
| FAS         | c.677-19_677-18insT        |           |            |            |            |            |           |           |            |            |            |   |            | 3,8%  |
| FAS         | c.641_642insC              |           |            |            |            |            |           |           |            |            |            |   |            | 2,6%  |
| LCP1        | c.491+60T>C                |           |            |            |            |            |           |           |            |            |            |   |            | 2,6%  |
| LCP1        | c.1172A>G                  |           |            |            |            |            |           |           |            |            |            |   |            | 1,3%  |
| LOC10012849 | c.2170A>G                  |           |            |            |            |            |           |           |            |            |            |   |            | 1,3%  |
| LOC10012849 | c.3061G>A                  |           |            |            |            |            |           |           |            |            |            |   |            | 1,3%  |
| LOC10012849 | c.2897C>T                  |           |            |            |            |            |           |           |            |            |            |   |            | 1,3%  |
| MYB         | c.545A>G                   |           |            |            |            |            |           |           |            |            |            |   |            | 9,0%  |
| MYB         | c.528-5T>C                 |           |            |            |            |            |           |           |            |            |            |   |            | 1,3%  |
| MYC         | c.593C>T                   |           |            |            |            |            |           |           |            |            |            |   |            | 1,3%  |
| NOTCH1      | c.6521A>G                  |           |            |            |            |            |           |           |            |            |            |   |            | 2,6%  |
| NOTCH1      | c.4348G>A                  |           |            |            |            |            |           |           |            |            |            |   |            | 2,6%  |
| NOTCH1      | c.383G>A                   |           |            |            |            |            |           |           |            |            |            |   |            | 1,3%  |
| NOTCH1      | c.1978G>A                  |           |            |            |            |            |           |           |            |            |            |   |            | 1,3%  |
| NOTCH1      | c.218C>T                   |           |            |            |            |            |           |           |            |            |            |   |            | 1,3%  |
| NOTCH1      | c.1477G>A                  |           |            |            |            |            |           |           |            |            |            |   |            | 1,3%  |
| NUMA1       | c.5654G>A                  |           |            |            |            |            |           |           |            |            |            |   |            | 1,3%  |
| PIK3CD      | c.931-9G>C                 |           |            |            |            |            |           |           |            |            |            |   |            | 7,7%  |
| PIK3CD      | c.931-14_931-13insC        |           |            |            |            |            |           |           |            |            |            |   |            | 5,1%  |
| PTPN1       | c.702+56delG               |           |            |            |            |            |           |           |            |            |            |   |            | 3,8%  |
| PTPN1       | c.1089-51C>T               |           |            |            |            |            |           |           |            |            |            |   |            | 1,3%  |
| REL         | c.133C>T                   |           |            |            |            |            |           |           |            |            |            |   |            | 1,3%  |
| RET         | c.2233C>T                  |           |            |            |            |            |           |           |            |            |            |   |            | 1,3%  |
| SH3BP5      | c.330+47C>A                |           |            |            |            |            |           |           |            |            |            |   |            | 2,6%  |
| SH3BP5      | c.330+47_330+48insA        |           |            |            |            |            |           |           |            |            |            |   |            | 1,3%  |
| SH3BP5,SH3B | c.1174A>G                  |           |            |            |            |            |           |           |            |            |            |   |            | 2,6%  |
| SMARCA4     | c.1119-12C>T               |           |            |            |            |            |           |           |            |            |            |   |            | 2,6%  |
| SMARCA4     | c.577G>A                   |           |            |            |            |            |           |           |            |            |            |   |            | 1,3%  |
| SMARCA4     | c.2974G>A                  |           |            |            |            |            |           |           |            |            |            |   |            | 1,3%  |
| SMARCA4     | c.3598C>T                  |           |            |            |            |            |           |           |            |            |            |   |            | 1,3%  |
| SOCS1       | c.307_321delGTGCGGACAGCCGC |           |            |            |            |            |           |           |            |            |            |   |            | 1,3%  |
| STAT3       | c.332A>G                   |           |            |            |            |            |           |           |            |            |            |   |            | 1,3%  |
| STAT6       | c.910delG                  |           | 42,40      |            |            |            |           |           |            |            |            |   |            | 10,3% |
| STAT6       | c.256-4G>A                 |           |            |            |            |            |           |           |            |            |            |   |            | 2,6%  |
| STAT6       | c.940G>A                   |           |            |            |            |            |           |           |            |            |            |   |            | 2,6%  |
| STAT6       | c.1513-20C>T               |           |            |            |            |            |           |           |            |            |            |   |            | 1,3%  |
| STAT6       | c.1876C>T                  |           |            |            |            |            |           |           |            |            |            |   |            | 1,3%  |
| STAT6       | c.681-7G>A                 |           |            |            |            |            |           |           |            |            |            |   |            | 1,3%  |
| TNFAIP3     | c.1018_1021delAATC         |           |            |            |            |            |           |           |            |            |            |   |            | 2,6%  |
| TNFAIP3     | c.131A>T                   |           |            |            |            |            |           |           | 12.77      | 12.01      |            |   |            | 2,6%  |
| TNFAIP3     | c.487-11G>T                |           |            |            | 49.04      | 53.99      |           |           |            |            |            |   |            | 2,6%  |
| TNFAIP3     | c.1343G>A                  |           |            |            |            |            |           |           |            |            |            |   |            | 1,3%  |
| TP53        | c.215C>G                   |           |            |            |            |            |           |           |            |            |            |   |            | 6,4%  |
| TP53        | c.97-6C>T                  |           |            |            |            |            |           |           |            |            |            |   |            | 5,1%  |
| TP53        | c.97-52G>A                 |           |            |            |            |            |           |           |            |            |            |   |            | 2,6%  |
| TP53        | c.524G>A                   |           |            |            |            |            |           |           | 10.65      | 8.30       |            |   |            | 2,6%  |
| TP53        | c.473G>A                   |           |            |            |            |            |           |           |            |            |            |   |            | 1,3%  |
| TP53        | c.818G>C                   |           |            |            |            |            |           |           |            |            |            |   |            | 1,3%  |
|             | SNVs                       | NA        | 1          | 0          | 2          | 1          | 0         | 0         | 2          | 2          | 0          | 0 |            |       |

| GENE        | CODING                     |            |                   |            |            |            |            |            |            |            |            | %     |
|-------------|----------------------------|------------|-------------------|------------|------------|------------|------------|------------|------------|------------|------------|-------|
|             |                            | BR190003_1 | BR190003_2        | BR190004_1 | BR190004_2 | BR190005_1 | BR190005_2 | BR190006_1 | BR190006_2 | BR190007_1 | BR190007_2 |       |
| ABL1        | c.3020C>T                  |            |                   |            |            |            |            |            |            |            |            | 1,3%  |
| B2M         | c.347-1G>T                 |            |                   |            |            |            |            |            |            |            |            | 2,6%  |
| B2M         | c.41_44delCTCT             |            |                   |            |            |            |            |            |            |            |            | 1,3%  |
| B2M         | c.64C>T                    |            |                   |            |            |            |            |            |            |            |            | 1,3%  |
| B2M         | c.67C>T                    |            |                   |            |            |            |            |            |            |            |            | 1,3%  |
| B2M         | c.67+5G>C                  |            |                   |            |            |            |            |            |            |            |            | 1,3%  |
| BCL10       | c.521T>A                   |            |                   |            |            |            |            |            |            |            |            | 2,6%  |
| CARD11      | c.1017+99T>C               |            |                   | 6,30       | 5,60       |            |            |            |            |            |            | 10,3% |
| CARD11      | c.1940+81G>A               |            |                   |            |            |            |            |            |            |            |            | 2,6%  |
| CARD11      | c.1864_1866delTCC          |            |                   |            |            |            |            |            |            |            |            | 1,3%  |
| CARD11      | c.1599_1600insT            |            |                   |            |            |            |            |            |            |            |            | 1,3%  |
| CARD11      | c.3274C>T                  |            |                   |            |            |            |            |            |            |            |            | 1,3%  |
| CASP8       | c.1357C>G                  | 49,42      | 48,92             |            |            |            |            |            |            |            |            | 2,6%  |
| CASP8       | c.151+3G>A                 |            |                   |            |            |            |            |            |            |            |            | 2,6%  |
| CD19        | c.1267A>G                  |            |                   |            |            |            |            |            |            |            |            | 1,3%  |
| CD38        | c.652A>T                   |            |                   |            |            |            |            |            |            |            |            | 1,3%  |
| CREBBP      | c.6980C>T                  |            |                   |            |            |            |            |            |            |            |            | 2,6%  |
| CREBBP      | c.6877C>T                  |            |                   |            |            |            |            |            |            |            |            | 1,3%  |
| CREBBP      | c.5173-20T>C               |            |                   |            |            |            |            |            |            |            |            | 1,3%  |
| CREBBP      | c.1573+11G>T               |            |                   |            |            |            |            |            |            |            |            | 1,3%  |
| CSF1R       | c.241A>G                   |            |                   |            |            |            |            |            |            |            |            | 2,6%  |
| CSF1R       | c.726_727insT              |            |                   |            |            |            |            |            |            |            |            | 2,6%  |
| CSF1R       | c.2655-49C>T               |            |                   |            |            |            |            |            |            |            |            | 1,3%  |
| CSF1R       | c.2113G>A                  |            |                   |            |            |            |            |            |            |            |            | 1,3%  |
| CSF1R       | c.1626+3G>A                |            |                   |            |            |            |            |            |            |            |            | 1,3%  |
| CSF1R       | c.1969+85C>T               |            |                   |            |            |            |            |            |            |            |            | 1,3%  |
| CSF1R       | c.1109G>A                  |            |                   |            |            |            |            |            |            |            |            | 1,3%  |
| CSF2        | c.32C>T                    |            |                   |            |            |            |            |            |            |            |            | 1,3%  |
| CSF2RB      | c.553G>A                   |            |                   |            |            |            |            |            |            |            |            | 2,6%  |
| CSF2RB      | c.855-1G>T                 |            |                   |            |            |            |            |            |            |            |            | 1,3%  |
| CSF2RB      | c.787G>A                   |            |                   |            |            |            |            |            |            |            |            | 1,3%  |
| CSF2RB      | c.855-38C>T                |            |                   |            |            |            |            |            |            |            |            | 1,3%  |
| CSF2RB      | c.855-35C>T                |            |                   |            |            |            |            |            |            |            |            | 1,3%  |
| CYLD        | c.2678-18T>C               |            |                   |            |            |            |            |            |            |            |            | 1,3%  |
| EP300       | c.3182_3183insA            |            |                   | 51,64      |            |            |            |            |            |            |            | 11,5% |
| EP300       | c.4517delG                 |            |                   | 26,31      |            |            |            |            |            |            |            | 5,1%  |
| EP300       | c.1529-20G>A               |            |                   |            |            |            |            |            |            |            |            | 1,3%  |
| FAS         | c.677-19_677-18insT        |            |                   |            |            | 24,06      |            |            |            |            |            | 3,8%  |
| FAS         | c.641_642insC              |            |                   |            |            |            |            |            |            |            |            | 2,6%  |
| LCP1        | c.491+60T>C                |            |                   |            |            |            |            |            |            |            |            | 2,6%  |
| LCP1        | c.1172A>G                  |            |                   |            |            |            |            |            |            |            |            | 1,3%  |
| LOC10012849 | c.2170A>G                  |            |                   |            |            |            |            |            |            |            |            | 1,3%  |
| LOC10012849 | c.3061G>A                  |            |                   |            |            |            |            |            |            |            |            | 1,3%  |
| LOC10012849 | c.2897C>T                  |            |                   |            |            |            |            |            |            |            |            | 1,3%  |
| MYB         | c.545A>G                   |            |                   |            |            |            |            |            |            |            |            | 9,0%  |
| MYB         | c.528-5T>C                 |            |                   |            |            |            |            |            |            |            |            | 1,3%  |
| MYC         | c.593C>T                   |            |                   |            |            |            |            |            |            |            |            | 1,3%  |
| NOTCH1      | c.6521A>G                  |            |                   |            |            |            |            |            |            |            |            | 2,6%  |
| NOTCH1      | c.4348G>A                  |            |                   |            |            |            |            |            |            |            |            | 2,6%  |
| NOTCH1      | c.383G>A                   |            |                   |            |            |            |            |            |            |            |            | 1,3%  |
| NOTCH1      | c.1978G>A                  |            |                   |            |            |            |            |            |            |            |            | 1,3%  |
| NOTCH1      | c.218C>T                   |            |                   |            |            |            |            |            |            |            |            | 1,3%  |
| NOTCH1      | c.1477G>A                  |            |                   |            |            |            |            |            |            |            |            | 1,3%  |
| NUMA1       | c.5654G>A                  |            |                   |            |            |            |            |            |            |            |            | 1,3%  |
| PIK3CD      | c.931-9G>C                 |            |                   |            |            |            |            |            |            |            |            | 7,7%  |
| PIK3CD      | c.931-14_931-13insC        |            |                   |            |            |            |            |            |            |            |            | 5,1%  |
| PTPN1       | c.702+56delG               |            |                   |            |            |            |            |            |            |            |            | 3,8%  |
| PTPN1       | c.1089-51C>T               |            |                   |            |            |            |            |            |            |            |            | 1,3%  |
| REL         | c.133C>T                   |            |                   |            |            |            |            |            |            |            |            | 1,3%  |
| RET         | c.2233C>T                  |            |                   |            |            |            |            |            |            |            |            | 1,3%  |
| SH3BP5      | c.330+47C>A                |            |                   |            |            |            |            |            |            |            |            | 2,6%  |
| SH3BP5      | c.330+47_330+48insA        |            |                   |            |            |            |            |            |            |            |            | 1,3%  |
| SH3BP5,SH3B | c.1174A>G                  |            |                   |            |            |            |            |            |            |            |            | 2,6%  |
| SMARCA4     | c.1119-12C>T               |            |                   |            |            |            |            |            |            |            |            | 2,6%  |
| SMARCA4     | c.577G>A                   |            |                   |            |            |            |            |            |            |            |            | 1,3%  |
| SMARCA4     | c.2974G>A                  |            |                   |            |            |            |            |            |            |            |            | 1,3%  |
| SMARCA4     | c.3598C>T                  |            |                   |            |            |            |            |            |            |            |            | 1,3%  |
| SOCS1       | c.307_321delGTGCGCAGACGCCG |            |                   |            |            |            |            |            |            |            |            | 1,3%  |
| STAT3       | c.332A>G                   |            |                   |            |            |            |            |            |            |            |            | 1,3%  |
| STAT6       | c.910delG                  |            | TGGGG=5,63, TGGGG |            |            |            |            |            |            |            |            | 10,3% |
| STAT6       | c.256-4G>A                 |            |                   |            |            |            | 48,00      | 48,40      |            |            |            | 2,6%  |
| STAT6       | c.940G>A                   |            |                   |            |            |            |            |            |            |            |            | 2,6%  |
| STAT6       | c.1513-20C>T               |            |                   |            |            |            |            |            |            |            |            | 1,3%  |
| STAT6       | c.1876C>T                  |            |                   |            |            |            |            |            |            |            |            | 1,3%  |
| STAT6       | c.681-7G>A                 |            |                   |            |            |            |            |            |            |            |            | 1,3%  |
| TNFAIP3     | c.1018_1021delAATC         |            |                   |            |            |            |            |            |            |            |            | 2,6%  |
| TNFAIP3     | c.131A>T                   |            |                   |            |            |            |            |            |            |            |            | 2,6%  |
| TNFAIP3     | c.487-11G>T                |            |                   |            |            |            |            |            |            |            |            | 2,6%  |
| TNFAIP3     | c.1343G>A                  |            |                   |            |            |            |            |            |            |            |            | 1,3%  |
| TP53        | c.215C>G                   |            |                   |            |            |            |            |            |            |            |            | 6,4%  |
| TP53        | c.97-6C>T                  |            |                   |            |            |            |            |            |            |            |            | 5,1%  |
| TP53        | c.97-52G>A                 |            |                   |            |            |            |            |            |            |            |            | 2,6%  |
| TP53        | c.524G>A                   |            |                   |            |            |            |            |            |            |            |            | 2,6%  |
| TP53        | c.473G>A                   |            |                   |            |            |            |            |            |            |            |            | 1,3%  |
| TP53        | c.818G>C                   |            |                   |            |            |            |            |            |            |            |            | 1,3%  |
|             | SNVs                       | 1          | 1                 | 4          | 2          | 0          | 1          | 1          | 1          | 0          | 0          |       |

| GENE        | CODING                     |            |                                |            |            |            |            |            |            |            |            | %     |
|-------------|----------------------------|------------|--------------------------------|------------|------------|------------|------------|------------|------------|------------|------------|-------|
|             |                            | BR190008_1 | BR190008_2                     | BR190009_1 | BR190009_2 | BR190010_1 | BR190010_2 | BR190011_1 | BR190011_2 | BR190012_1 | BR190012_2 |       |
| ABL1        | c.3020C>T                  |            |                                |            |            |            |            |            |            |            | NA         | 1,3%  |
| B2M         | c.347-1G>T                 |            |                                | 22,71      | 19,73      |            |            |            |            |            |            | 2,6%  |
| B2M         | c.41_44delCTCT             |            |                                |            |            |            |            |            |            |            |            | 1,3%  |
| B2M         | c.64C>T                    |            |                                |            |            |            |            |            |            |            |            | 1,3%  |
| B2M         | c.67C>T                    |            |                                |            |            |            |            |            |            |            |            | 1,3%  |
| B2M         | c.67+5G>C                  |            |                                |            |            |            |            |            |            |            |            | 1,3%  |
| BCL10       | c.521T>A                   |            |                                | 17,13      | 13,74      |            |            |            |            |            |            | 2,6%  |
| CARD11      | c.1017+99T>C               |            |                                |            |            |            |            |            |            |            |            | 10,3% |
| CARD11      | c.1940+81G>A               |            |                                |            |            |            |            |            |            |            |            | 2,6%  |
| CARD11      | c.1864_1866delTCC          |            | GGGAGGAGAA=1.52, GGGAGGAG=3.09 |            |            |            |            |            |            |            |            | 1,3%  |
| CARD11      | c.1599_1600insT            |            |                                |            |            |            |            |            |            |            |            | 1,3%  |
| CARD11      | c.3274C>T                  |            |                                |            |            |            |            |            |            |            |            | 1,3%  |
| CASP8       | c.1357C>G                  |            |                                |            |            |            |            |            |            |            |            | 2,6%  |
| CASP8       | c.151+3G>A                 |            |                                |            |            |            |            |            |            |            |            | 2,6%  |
| CD19        | c.1267A>G                  |            |                                |            |            |            |            |            |            |            |            | 1,3%  |
| CD38        | c.652A>T                   |            |                                |            |            |            |            |            |            |            |            | 1,3%  |
| CREBBP      | c.6980C>T                  |            |                                |            |            | 48,35      | 52,65      |            |            |            |            | 2,6%  |
| CREBBP      | c.6877C>T                  |            |                                |            |            |            |            |            |            |            |            | 1,3%  |
| CREBBP      | c.5173-20T>C               |            |                                |            |            |            |            |            |            |            |            | 1,3%  |
| CREBBP      | c.1573+11G>T               |            |                                |            |            |            |            |            |            |            |            | 1,3%  |
| CSF1R       | c.241A>G                   |            |                                |            |            |            |            | 37,98      | 43,58      |            |            | 2,6%  |
| CSF1R       | c.726_727insT              |            |                                |            |            |            |            |            |            |            |            | 2,6%  |
| CSF1R       | c.2655-49C>T               |            |                                |            |            |            |            |            |            |            |            | 1,3%  |
| CSF1R       | c.2113G>A                  |            |                                |            |            |            |            |            |            |            |            | 1,3%  |
| CSF1R       | c.1626+3G>A                |            |                                |            |            |            |            |            |            |            |            | 1,3%  |
| CSF1R       | c.1969+85C>T               |            |                                |            |            |            |            |            |            |            |            | 1,3%  |
| CSF1R       | c.1109G>A                  |            |                                |            |            |            |            |            |            |            |            | 1,3%  |
| CSF2        | c.32C>T                    |            |                                |            |            |            |            |            |            |            |            | 1,3%  |
| CSF2RB      | c.553G>A                   |            |                                |            |            |            |            |            |            |            |            | 2,6%  |
| CSF2RB      | c.855-1G>T                 |            |                                |            |            |            |            |            |            |            |            | 1,3%  |
| CSF2RB      | c.787G>A                   |            |                                |            |            |            |            |            |            |            |            | 1,3%  |
| CSF2RB      | c.855-38C>T                |            |                                |            |            |            |            |            |            |            |            | 1,3%  |
| CSF2RB      | c.855-35C>T                |            |                                |            |            |            |            |            |            |            |            | 1,3%  |
| CYLD        | c.2678-18T>C               |            |                                |            |            |            |            |            |            |            |            | 1,3%  |
| EP300       | c.3182_3183insA            |            |                                |            |            |            |            | 77,66      | 62,59      |            |            | 11,5% |
| EP300       | c.4517delG                 |            |                                |            |            |            |            |            |            |            |            | 5,1%  |
| EP300       | c.1529-20G>A               |            |                                |            |            |            |            |            |            |            |            | 1,3%  |
| FAS         | c.677-19_677-18insT        |            |                                |            |            |            | 24,97      |            |            |            |            | 3,8%  |
| FAS         | c.641_642insC              |            |                                |            |            |            |            |            |            |            |            | 2,6%  |
| LCP1        | c.491+60T>C                |            | 44,39                          | 44,01      |            |            |            |            |            |            |            | 2,6%  |
| LCP1        | c.1172A>G                  |            |                                |            |            |            |            |            |            |            |            | 1,3%  |
| LOC10012849 | c.2170A>G                  |            |                                |            |            |            |            |            |            |            |            | 1,3%  |
| LOC10012849 | c.3061G>A                  |            |                                |            |            |            |            |            |            |            |            | 1,3%  |
| LOC10012849 | c.2897C>T                  |            |                                |            |            |            |            |            |            |            |            | 1,3%  |
| MYB         | c.545A>G                   |            |                                |            | 7,62       |            |            |            |            |            |            | 9,0%  |
| MYB         | c.528-5T>C                 |            |                                |            |            |            |            |            |            |            |            | 1,3%  |
| MYC         | c.593C>T                   |            |                                |            |            |            |            |            |            |            |            | 1,3%  |
| NOTCH1      | c.6521A>G                  |            |                                |            |            | 51,10      | 46,75      |            |            |            |            | 2,6%  |
| NOTCH1      | c.4348G>A                  |            |                                |            |            |            |            |            |            |            |            | 2,6%  |
| NOTCH1      | c.383G>A                   |            |                                |            |            |            |            |            |            |            |            | 1,3%  |
| NOTCH1      | c.1978G>A                  |            |                                |            |            |            |            |            |            |            |            | 1,3%  |
| NOTCH1      | c.218C>T                   |            |                                |            |            |            |            |            |            |            |            | 1,3%  |
| NOTCH1      | c.1477G>A                  |            |                                |            |            |            |            |            |            |            |            | 1,3%  |
| NUMA1       | c.5654G>A                  |            |                                |            |            |            |            |            |            |            |            | 1,3%  |
| PIK3CD      | c.931-9G>C                 |            |                                |            |            |            |            |            |            |            |            | 7,7%  |
| PIK3CD      | c.931-14_931-13insC        |            |                                |            |            |            |            |            |            |            |            | 5,1%  |
| PTPN1       | c.702+56delG               |            |                                |            |            |            |            |            |            |            |            | 3,8%  |
| PTPN1       | c.1089-51C>T               |            |                                |            |            |            |            |            |            |            |            | 1,3%  |
| REL         | c.133C>T                   |            |                                |            |            |            |            |            |            |            |            | 1,3%  |
| RET         | c.2233C>T                  |            |                                |            |            |            |            |            |            |            |            | 1,3%  |
| SH3BP5      | c.330+47C>A                |            |                                |            |            |            |            |            |            |            |            | 2,6%  |
| SH3BP5      | c.330+47_330+48insA        |            |                                |            |            |            |            |            |            |            |            | 1,3%  |
| SH3BP5,SH3B | c.1174A>G                  |            |                                |            |            |            |            |            |            |            |            | 2,6%  |
| SMARCA4     | c.1119-12C>T               |            |                                |            |            | 47,75      | 48,50      |            |            |            |            | 2,6%  |
| SMARCA4     | c.577G>A                   |            |                                |            |            |            |            |            |            |            |            | 1,3%  |
| SMARCA4     | c.2974G>A                  |            |                                |            |            |            |            |            |            |            |            | 1,3%  |
| SMARCA4     | c.3598C>T                  |            |                                |            |            |            |            |            |            |            |            | 1,3%  |
| SOCS1       | c.307_321delGTGCGCAGAGCCGC |            |                                |            |            |            |            |            |            |            |            | 1,3%  |
| STAT3       | c.332A>G                   |            |                                |            |            |            |            |            |            |            |            | 1,3%  |
| STAT6       | c.910delG                  |            | =8.03, TGGGGC=27.98            |            |            |            |            |            |            |            |            | 10,3% |
| STAT6       | c.256-4G>A                 |            |                                |            |            |            |            |            |            |            |            | 2,6%  |
| STAT6       | c.940G>A                   |            |                                |            |            |            |            |            |            |            |            | 2,6%  |
| STAT6       | c.1513-20C>T               |            |                                |            |            |            |            |            |            |            |            | 1,3%  |
| STAT6       | c.1876C>T                  |            |                                |            |            |            |            |            |            |            |            | 1,3%  |
| STAT6       | c.681-7G>A                 |            |                                |            |            |            |            |            |            |            |            | 1,3%  |
| TNFAIP3     | c.1018_1021delAATC         |            | 25,35                          | 37,74      |            |            |            |            |            |            |            | 2,6%  |
| TNFAIP3     | c.131A>T                   |            |                                |            |            |            |            |            |            |            |            | 2,6%  |
| TNFAIP3     | c.487-11G>T                |            |                                |            |            |            |            |            |            |            |            | 2,6%  |
| TNFAIP3     | c.1343G>A                  |            |                                |            |            |            |            |            |            |            |            | 1,3%  |
| TP53        | c.215C>G                   |            |                                |            |            |            |            |            |            |            |            | 6,4%  |
| TP53        | c.97-6C>T                  |            |                                |            |            |            |            |            |            |            |            | 5,1%  |
| TP53        | c.97-52G>A                 | 49,23      | 54,34                          |            |            |            |            |            |            |            |            | 2,6%  |
| TP53        | c.524G>A                   |            |                                |            |            |            |            |            |            |            |            | 2,6%  |
| TP53        | c.473G>A                   |            |                                |            |            |            |            |            |            |            |            | 1,3%  |
| TP53        | c.818G>C                   |            |                                |            |            |            |            |            |            |            |            | 1,3%  |
|             | SNVs                       | 2          | 1                              | 5          | 5          | 3          | 4          | 2          | 2          | NA         | 0          |       |

| GENE        | CODING                    |            |            |            |            |            |            |                                                   |            |            |            | %     |
|-------------|---------------------------|------------|------------|------------|------------|------------|------------|---------------------------------------------------|------------|------------|------------|-------|
|             |                           | BR190013_1 | BR190013_2 | BR190014_1 | BR190014_2 | BR190015_1 | BR190015_2 | BR190016_1                                        | BR190016_2 | BR190017_1 | BR190017_2 |       |
| ABL1        | c.3020C>T                 |            |            |            |            |            |            | 9,39                                              |            |            |            | 1,3%  |
| B2M         | c.347-1G>T                |            |            |            |            |            |            |                                                   |            |            |            | 2,6%  |
| B2M         | c.41_44delCTCT            |            |            |            |            |            |            |                                                   |            |            |            | 1,3%  |
| B2M         | c.64C>T                   |            |            |            |            |            |            |                                                   |            |            |            | 1,3%  |
| B2M         | c.67C>T                   |            |            |            |            |            |            |                                                   |            |            |            | 1,3%  |
| B2M         | c.67+5G>C                 |            |            |            |            |            |            |                                                   |            |            |            | 1,3%  |
| BCL10       | c.521T>A                  |            |            |            |            |            |            |                                                   |            |            |            | 2,6%  |
| CARD11      | c.1017+99T>C              |            |            | 6,20       |            |            |            |                                                   |            |            |            | 10,3% |
| CARD11      | c.1940+81G>A              | 49,23      | 56,13      |            |            |            |            |                                                   |            |            |            | 2,6%  |
| CARD11      | c.1864_1866delTCC         |            |            |            |            |            |            |                                                   |            |            |            | 1,3%  |
| CARD11      | c.1599_1600insT           |            |            |            |            |            |            |                                                   |            |            |            | 1,3%  |
| CARD11      | c.3274C>T                 |            |            |            |            |            |            |                                                   |            |            |            | 1,3%  |
| CASP8       | c.1357C>G                 |            |            |            |            |            |            |                                                   |            |            |            | 2,6%  |
| CASP8       | c.151+3G>A                |            |            | 43,41      | 35,45      |            |            |                                                   |            |            |            | 2,6%  |
| CD19        | c.1267A>G                 |            |            |            |            |            |            |                                                   |            |            |            | 1,3%  |
| CD38        | c.652A>T                  |            |            |            |            |            |            |                                                   |            |            |            | 1,3%  |
| CREBBP      | c.6980C>T                 |            |            |            |            |            |            |                                                   |            |            |            | 2,6%  |
| CREBBP      | c.6877C>T                 |            |            |            |            |            |            |                                                   |            |            |            | 1,3%  |
| CREBBP      | c.5173-20T>C              |            |            |            |            |            |            |                                                   |            |            |            | 1,3%  |
| CREBBP      | c.1573+11G>T              |            |            |            |            |            |            |                                                   |            |            |            | 1,3%  |
| CSF1R       | c.241A>G                  |            |            |            |            |            |            |                                                   |            |            |            | 2,6%  |
| CSF1R       | c.726_727insT             |            |            |            |            |            |            | TA=59,28, TG=17,73                                |            |            |            | 2,6%  |
| CSF1R       | c.2655-49C>T              |            |            |            |            |            |            | 7,78                                              |            |            |            | 1,3%  |
| CSF1R       | c.2113G>A                 |            |            |            |            |            |            | 5,98                                              |            |            |            | 1,3%  |
| CSF1R       | c.1626+3G>A               |            |            |            |            |            |            |                                                   |            |            |            | 1,3%  |
| CSF1R       | c.1969+85C>T              |            |            |            |            |            |            |                                                   |            |            |            | 1,3%  |
| CSF1R       | c.1109G>A                 |            |            |            |            |            |            |                                                   |            |            |            | 1,3%  |
| CSF2        | c.32C>T                   |            |            |            |            |            |            |                                                   |            |            |            | 1,3%  |
| CSF2RB      | c.553G>A                  |            |            |            |            |            |            |                                                   |            |            |            | 2,6%  |
| CSF2RB      | c.855-1G>T                |            |            |            |            |            |            |                                                   |            |            |            | 1,3%  |
| CSF2RB      | c.787G>A                  |            |            |            |            |            |            |                                                   |            |            |            | 1,3%  |
| CSF2RB      | c.855-38C>T               |            |            |            |            |            |            |                                                   |            |            |            | 1,3%  |
| CSF2RB      | c.855-35C>T               |            |            |            |            |            |            |                                                   |            |            |            | 1,3%  |
| CYLD        | c.2678-18T>C              |            |            |            |            |            |            |                                                   |            |            |            | 1,3%  |
| EP300       | c.3182_3183insA           |            |            |            |            |            | 50,13      |                                                   | 47,76      | 49,20      | 48,37      | 11,5% |
| EP300       | c.4517delG                |            |            |            |            |            |            |                                                   |            |            |            | 5,1%  |
| EP300       | c.1529-20G>A              |            |            |            |            |            |            |                                                   |            |            |            | 1,3%  |
| FAS         | c.677-19_677-18insT       |            |            |            |            |            |            |                                                   |            |            |            | 3,8%  |
| FAS         | c.641_642insC             |            |            |            |            |            |            |                                                   |            |            |            | 2,6%  |
| LCP1        | c.491+60T>C               |            |            |            |            |            |            |                                                   |            |            |            | 2,6%  |
| LCP1        | c.1172A>G                 |            |            |            |            |            |            |                                                   |            |            |            | 1,3%  |
| LOC10012849 | c.2170A>G                 |            |            |            |            |            |            |                                                   |            |            |            | 1,3%  |
| LOC10012849 | c.3061G>A                 |            |            |            |            |            |            |                                                   |            |            |            | 1,3%  |
| LOC10012849 | c.2897C>T                 |            |            |            |            |            |            |                                                   |            |            |            | 1,3%  |
| MYB         | c.545A>G                  |            |            |            |            |            |            |                                                   |            |            |            | 9,0%  |
| MYB         | c.528-5T>C                |            |            |            |            |            |            | 11,07                                             |            |            |            | 1,3%  |
| MYC         | c.593C>T                  |            |            |            |            |            |            |                                                   |            |            |            | 1,3%  |
| NOTCH1      | c.6521A>G                 |            |            |            |            |            |            |                                                   |            |            |            | 2,6%  |
| NOTCH1      | c.4348G>A                 |            |            |            |            |            |            |                                                   |            |            |            | 2,6%  |
| NOTCH1      | c.383G>A                  |            |            |            |            |            |            |                                                   |            |            |            | 1,3%  |
| NOTCH1      | c.1978G>A                 |            |            |            |            |            |            |                                                   |            |            |            | 1,3%  |
| NOTCH1      | c.218C>T                  |            |            |            |            |            |            |                                                   |            |            |            | 1,3%  |
| NOTCH1      | c.1477G>A                 |            |            |            |            |            |            |                                                   |            |            |            | 1,3%  |
| NUMA1       | c.5654G>A                 |            |            |            |            |            |            |                                                   |            |            |            | 1,3%  |
| PIK3CD      | c.931-9G>C                |            |            |            |            | 53,36      | 48,56      | 6,03                                              |            |            |            | 7,7%  |
| PIK3CD      | c.931-14_931-13insC       |            |            |            |            |            |            |                                                   |            |            |            | 5,1%  |
| PTPN1       | c.702+56delG              |            |            |            |            |            |            |                                                   |            |            |            | 3,8%  |
| PTPN1       | c.1089-51C>T              |            |            |            |            |            |            |                                                   |            |            |            | 1,3%  |
| REL         | c.133C>T                  |            |            |            |            |            |            |                                                   |            |            |            | 1,3%  |
| RET         | c.2233C>T                 |            |            |            |            |            |            |                                                   |            |            |            | 1,3%  |
| SH3BP5      | c.330+47C>A               |            |            |            |            |            |            |                                                   |            |            |            | 2,6%  |
| SH3BP5      | c.330+47_330+48insA       |            |            |            |            |            |            |                                                   |            |            |            | 1,3%  |
| SH3BP5,SH3B | c.1174A>G                 |            |            |            |            |            |            |                                                   |            |            |            | 2,6%  |
| SMARCA4     | c.1119-12C>T              |            |            |            |            |            |            |                                                   |            |            |            | 2,6%  |
| SMARCA4     | c.577G>A                  |            |            |            |            |            |            |                                                   |            |            |            | 1,3%  |
| SMARCA4     | c.2974G>A                 |            |            |            |            |            |            |                                                   |            |            |            | 1,3%  |
| SMARCA4     | c.3598C>T                 |            |            |            |            |            |            |                                                   |            |            |            | 1,3%  |
| SOCS1       | c.307_321delGTGCGCAGACGGC |            |            |            |            |            |            |                                                   |            |            |            | 1,3%  |
| STAT3       | c.332A>G                  |            |            |            |            |            |            |                                                   |            |            |            | 1,3%  |
| STAT6       | c.910delG                 |            |            |            |            |            |            |                                                   |            |            |            | 10,3% |
| STAT6       | c.256-4G>A                |            |            |            |            |            |            |                                                   |            |            |            | 2,6%  |
| STAT6       | c.940G>A                  |            |            |            |            |            |            |                                                   |            |            |            | 2,6%  |
| STAT6       | c.1513-20C>T              |            |            |            |            |            |            |                                                   |            |            |            | 1,3%  |
| STAT6       | c.1876C>T                 |            |            |            |            |            |            |                                                   |            |            |            | 1,3%  |
| STAT6       | c.681-7G>A                |            |            |            |            |            |            |                                                   |            |            |            | 1,3%  |
| TNFAIP3     | c.1018_1021delAATC        |            |            |            |            |            |            |                                                   |            |            |            | 2,6%  |
| TNFAIP3     | c.131A>T                  |            |            |            |            |            |            |                                                   |            |            |            | 2,6%  |
| TNFAIP3     | c.487-11G>T               |            |            |            |            |            |            |                                                   |            |            |            | 2,6%  |
| TNFAIP3     | c.1343G>A                 |            |            |            |            |            |            |                                                   |            |            |            | 1,3%  |
| TP53        | c.215C>G                  |            |            |            |            |            |            | CGCGGG=48.46, CGGGGA=1.0, GCGGG=47.35, CGGGA=1.47 |            |            |            | 6,4%  |
| TP53        | c.97-6C>T                 | 52,25      | 44,68      |            |            |            |            |                                                   |            |            |            | 5,1%  |
| TP53        | c.97-52G>A                |            |            |            |            |            |            |                                                   |            |            |            | 2,6%  |
| TP53        | c.524G>A                  |            |            |            |            |            |            |                                                   |            |            |            | 2,6%  |
| TP53        | c.473G>A                  |            |            |            |            |            |            |                                                   |            |            |            | 1,3%  |
| TP53        | c.818G>C                  |            |            |            |            |            |            |                                                   |            |            |            | 1,3%  |
|             | SNVs                      | 2          | 2          | 2          | 1          | 1          | 2          | 7                                                 | 1          | 2          | 1          |       |

| GENE        | CODING                   |            |            |            |            |            |            |            |            |            |            | %     |
|-------------|--------------------------|------------|------------|------------|------------|------------|------------|------------|------------|------------|------------|-------|
|             |                          | BR190019_1 | BR190019_2 | BR190020_1 | BR190020_2 | BR200021_1 | BR200021_2 | BR200023_1 | BR200023_2 | BR200026_1 | BR200026_2 |       |
| ABL1        | c.3020C>T                |            |            |            |            | NA         |            |            |            |            |            | 1,3%  |
| B2M         | c.347-1G>T               |            |            |            |            |            |            |            |            |            |            | 2,6%  |
| B2M         | c.41_44delCTCT           |            |            |            |            |            |            |            |            |            |            | 1,3%  |
| B2M         | c.64C>T                  |            |            |            |            |            |            |            |            |            |            | 1,3%  |
| B2M         | c.67C>T                  |            |            |            |            |            |            |            |            |            |            | 1,3%  |
| B2M         | c.67+5G>C                |            |            |            |            |            |            |            |            |            |            | 1,3%  |
| BCL10       | c.521T>A                 |            |            |            |            |            |            |            |            |            |            | 2,6%  |
| CARD11      | c.1017+99T>C             |            |            | 5,40       |            |            |            |            |            |            |            | 10,3% |
| CARD11      | c.1940+81G>A             |            |            |            |            |            |            |            |            |            |            | 2,6%  |
| CARD11      | c.1864_1866delTCC        |            |            |            |            |            |            |            |            |            |            | 1,3%  |
| CARD11      | c.1599_1600insT          |            |            |            |            |            |            |            |            |            |            | 1,3%  |
| CARD11      | c.3274C>T                |            |            |            |            |            |            |            |            |            |            | 1,3%  |
| CASP8       | c.1357C>G                |            |            |            |            |            |            |            |            |            |            | 2,6%  |
| CASP8       | c.151+3G>A               |            |            |            |            |            |            |            |            |            |            | 2,6%  |
| CD19        | c.1267A>G                |            |            |            |            |            |            |            |            |            |            | 1,3%  |
| CD38        | c.652A>T                 |            |            |            |            |            |            |            |            |            |            | 1,3%  |
| CREBBP      | c.6980C>T                |            |            |            |            |            |            |            |            |            |            | 2,6%  |
| CREBBP      | c.6877C>T                |            |            |            |            |            |            |            |            |            |            | 1,3%  |
| CREBBP      | c.5173-20T>C             |            |            |            |            |            |            |            |            |            |            | 1,3%  |
| CREBBP      | c.1573+11G>T             |            |            |            |            |            |            |            |            |            |            | 1,3%  |
| CSF1R       | c.241A>G                 |            |            |            |            |            |            |            |            |            |            | 2,6%  |
| CSF1R       | c.726_727insT            |            |            |            |            |            |            |            |            |            |            | 2,6%  |
| CSF1R       | c.2655-49C>T             |            |            |            |            |            |            |            |            |            |            | 1,3%  |
| CSF1R       | c.2113G>A                |            |            |            |            |            |            |            |            |            |            | 1,3%  |
| CSF1R       | c.1626+3G>A              |            |            |            |            |            |            |            |            |            |            | 1,3%  |
| CSF1R       | c.1969+85C>T             |            |            |            |            |            |            |            |            |            |            | 1,3%  |
| CSF1R       | c.1109G>A                |            |            |            |            |            |            |            |            |            |            | 1,3%  |
| CSF2        | c.32C>T                  |            |            |            |            |            |            |            |            |            |            | 1,3%  |
| CSF2RB      | c.553G>A                 |            |            |            |            |            |            |            |            |            |            | 2,6%  |
| CSF2RB      | c.855-1G>T               |            |            |            |            |            |            |            |            |            |            | 1,3%  |
| CSF2RB      | c.787G>A                 |            |            |            |            |            |            |            |            |            |            | 1,3%  |
| CSF2RB      | c.855-38C>T              |            |            |            |            |            |            |            |            |            |            | 1,3%  |
| CSF2RB      | c.855-35C>T              |            |            |            |            |            |            |            |            |            |            | 1,3%  |
| CYLD        | c.2678-18T>C             |            |            |            |            |            |            |            |            |            |            | 1,3%  |
| EP300       | c.3182_3183insA          |            |            |            |            |            |            |            |            |            |            | 11,5% |
| EP300       | c.4517delG               |            |            |            |            |            |            |            |            |            |            | 5,1%  |
| EP300       | c.1529-20G>A             |            |            |            |            |            |            |            |            |            |            | 1,3%  |
| FAS         | c.677-19_677-18insT      |            |            |            |            |            |            |            |            |            |            | 3,8%  |
| FAS         | c.641_642insC            |            |            | 52,61      |            |            |            |            |            |            |            | 2,6%  |
| LCP1        | c.491+60T>C              |            |            |            |            |            |            |            |            |            |            | 2,6%  |
| LCP1        | c.1172A>G                |            |            |            |            |            |            |            |            |            |            | 1,3%  |
| LOC10012849 | c.2170A>G                |            |            |            |            |            |            |            |            |            |            | 1,3%  |
| LOC10012849 | c.3061G>A                |            |            |            |            |            |            |            |            |            |            | 1,3%  |
| LOC10012849 | c.2897C>T                |            |            |            |            |            |            |            |            |            |            | 1,3%  |
| MYB         | c.545A>G                 |            |            | 5,30       |            |            |            | 5,30       |            | 5,65       |            | 9,0%  |
| MYB         | c.528-5T>C               |            |            |            |            |            |            |            |            |            |            | 1,3%  |
| MYC         | c.593C>T                 |            |            |            |            |            |            |            |            |            |            | 1,3%  |
| NOTCH1      | c.6521A>G                |            |            |            |            |            |            |            |            |            |            | 2,6%  |
| NOTCH1      | c.4348G>A                |            |            | 48,02      | 51,23      |            |            |            |            |            |            | 2,6%  |
| NOTCH1      | c.383G>A                 |            |            |            |            |            |            |            |            |            |            | 1,3%  |
| NOTCH1      | c.1978G>A                |            |            |            |            |            |            |            |            |            |            | 1,3%  |
| NOTCH1      | c.218C>T                 |            |            |            |            |            |            |            |            |            |            | 1,3%  |
| NOTCH1      | c.1477G>A                |            |            |            |            |            |            |            |            |            |            | 1,3%  |
| NUMA1       | c.5654G>A                |            |            |            |            |            |            |            |            |            |            | 1,3%  |
| PIK3CD      | c.931-9G>C               |            |            |            |            |            |            | 51,35      |            |            |            | 7,7%  |
| PIK3CD      | c.931-14_931-13insC      |            |            |            |            |            |            | 50,20      |            |            |            | 5,1%  |
| PTPN1       | c.702+56delG             |            |            |            |            |            |            |            |            |            |            | 3,8%  |
| PTPN1       | c.1089-51C>T             |            |            |            |            |            |            |            |            |            |            | 1,3%  |
| REL         | c.133C>T                 |            |            |            |            |            |            |            |            |            |            | 1,3%  |
| RET         | c.2233C>T                |            |            |            |            |            |            |            |            |            |            | 1,3%  |
| SH3BP5      | c.330+47C>A              |            |            |            |            |            |            |            |            |            |            | 2,6%  |
| SH3BP5      | c.330+47_330+48insA      |            |            |            |            |            |            |            |            |            |            | 1,3%  |
| SH3BP5,SH3B | c.1174A>G                |            |            |            |            |            |            |            |            |            |            | 2,6%  |
| SMARCA4     | c.1119-12C>T             |            |            |            |            |            |            |            |            |            |            | 2,6%  |
| SMARCA4     | c.577G>A                 |            |            |            |            |            |            |            |            |            |            | 1,3%  |
| SMARCA4     | c.2974G>A                |            |            |            |            |            |            |            |            |            |            | 1,3%  |
| SMARCA4     | c.3598C>T                |            |            |            |            |            |            |            |            |            |            | 1,3%  |
| SOCS1       | c.307_321delGTGCGCAGCCGC |            |            |            |            |            |            |            |            |            |            | 1,3%  |
| STAT3       | c.332A>G                 |            |            |            |            |            |            |            |            |            |            | 1,3%  |
| STAT6       | c.910delG                |            |            |            |            |            |            |            |            |            |            | 10,3% |
| STAT6       | c.256-4G>A               |            |            |            |            |            |            |            |            |            |            | 2,6%  |
| STAT6       | c.940G>A                 |            |            |            |            |            |            |            |            |            |            | 2,6%  |
| STAT6       | c.1513-20C>T             |            |            |            |            |            |            |            |            |            |            | 1,3%  |
| STAT6       | c.1876C>T                |            |            |            |            |            |            |            |            |            |            | 1,3%  |
| STAT6       | c.681-7G>A               |            |            |            |            |            |            |            |            |            |            | 1,3%  |
| TNFAIP3     | c.1018_1021delAATC       |            |            |            |            |            |            |            |            |            |            | 2,6%  |
| TNFAIP3     | c.131A>T                 |            |            |            |            |            |            |            |            |            |            | 2,6%  |
| TNFAIP3     | c.487-11G>T              |            |            |            |            |            |            |            |            |            |            | 2,6%  |
| TNFAIP3     | c.1343G>A                |            |            |            |            |            |            |            |            |            |            | 1,3%  |
| TP53        | c.215C>G                 |            |            |            |            |            |            |            |            |            |            | 6,4%  |
| TP53        | c.97-6C>T                |            |            |            |            |            |            |            |            |            |            | 5,1%  |
| TP53        | c.97-52G>A               |            |            |            |            |            |            |            |            |            |            | 2,6%  |
| TP53        | c.524G>A                 |            |            |            |            |            |            |            |            |            |            | 2,6%  |
| TP53        | c.473G>A                 |            |            |            |            |            |            |            |            |            |            | 1,3%  |
| TP53        | c.818G>C                 |            |            |            |            |            |            |            |            |            |            | 1,3%  |
|             | SNVs                     | 0          | 0          | 4          | 1          | NA         | 2          | 1          | 0          | 1          | 0          |       |



| GENE        | CODING                     |            |            |            |            |            |            |            |            |            |            |            |            | %     |
|-------------|----------------------------|------------|------------|------------|------------|------------|------------|------------|------------|------------|------------|------------|------------|-------|
|             |                            | BR200026_1 | BR200026_2 | BR200027_1 | BR200027_2 | BR200028_1 | BR200028_2 | BR200030_1 | BR200030_2 | BR200031_1 | BR200031_2 | BR200032_1 | BR200032_2 |       |
| ABL1        | c.3020C>T                  |            |            |            |            | NA         | NA         |            |            |            |            |            |            | 1,3%  |
| B2M         | c.347-1G>T                 |            |            |            |            |            |            |            |            |            |            |            |            | 2,6%  |
| B2M         | c.41_44delCTCT             |            |            |            |            |            |            |            |            |            |            |            |            | 1,3%  |
| B2M         | c.64C>T                    |            |            |            |            |            |            |            |            |            |            |            |            | 1,3%  |
| B2M         | c.67C>T                    |            |            |            |            |            |            |            |            |            |            |            |            | 1,3%  |
| B2M         | c.67+5G>C                  |            |            |            |            |            |            |            |            |            |            |            |            | 1,3%  |
| BCL10       | c.521T>A                   |            |            |            |            |            |            |            |            |            |            |            |            | 2,6%  |
| CARD11      | c.1017+99T>C               |            |            |            | 6,66       |            |            |            |            |            | 8,10       | 7,79       |            | 10,3% |
| CARD11      | c.1940+81G>A               |            |            |            |            |            |            |            |            |            |            |            |            | 2,6%  |
| CARD11      | c.1864_1866delTCC          |            |            |            |            |            |            |            |            |            |            |            |            | 1,3%  |
| CARD11      | c.1599_1600insT            |            |            |            |            |            |            |            |            |            |            |            |            | 1,3%  |
| CARD11      | c.3274C>T                  |            |            |            |            |            |            |            |            |            |            |            |            | 1,3%  |
| CASP8       | c.1357C>G                  |            |            |            |            |            |            |            |            |            |            |            |            | 2,6%  |
| CASP8       | c.151+3G>A                 |            |            |            |            |            |            |            |            |            |            |            |            | 2,6%  |
| CD19        | c.1267A>G                  |            |            |            |            |            |            |            |            |            |            |            |            | 1,3%  |
| CD38        | c.652A>T                   |            |            |            |            |            |            |            |            |            |            |            |            | 1,3%  |
| CREBBP      | c.6980C>T                  |            |            |            |            |            |            |            |            |            |            |            |            | 2,6%  |
| CREBBP      | c.6877C>T                  |            |            |            |            |            |            |            |            |            |            |            |            | 1,3%  |
| CREBBP      | c.5173-20T>C               |            |            |            |            |            |            |            |            |            |            |            |            | 1,3%  |
| CREBBP      | c.1573+11G>T               |            |            |            |            |            |            |            |            |            |            |            |            | 1,3%  |
| CSF1R       | c.241A>G                   |            |            |            |            |            |            |            |            |            |            |            |            | 2,6%  |
| CSF1R       | c.726_727insT              |            |            |            |            |            |            |            |            |            |            |            |            | 2,6%  |
| CSF1R       | c.2655-49C>T               |            |            |            |            |            |            |            |            |            |            |            |            | 1,3%  |
| CSF1R       | c.2113G>A                  |            |            |            |            |            |            |            |            |            |            |            |            | 1,3%  |
| CSF1R       | c.1626+3G>A                |            |            | 48,65      |            |            |            |            |            |            |            |            |            | 1,3%  |
| CSF1R       | c.1969+85C>T               |            |            |            |            |            |            |            |            |            |            |            |            | 1,3%  |
| CSF1R       | c.1109G>A                  |            |            |            |            |            |            |            |            |            |            |            |            | 1,3%  |
| CSF2        | c.32C>T                    |            |            |            |            |            |            |            |            |            |            |            |            | 1,3%  |
| CSF2RB      | c.553G>A                   |            |            |            |            |            |            |            |            |            |            |            |            | 2,6%  |
| CSF2RB      | c.855-1G>T                 |            |            |            |            |            |            |            |            |            |            |            |            | 1,3%  |
| CSF2RB      | c.787G>A                   |            |            |            |            |            |            |            |            |            |            |            |            | 1,3%  |
| CSF2RB      | c.855-38C>T                |            |            |            |            |            |            |            |            |            |            |            |            | 1,3%  |
| CSF2RB      | c.855-35C>T                |            |            |            |            |            |            |            |            |            |            |            |            | 1,3%  |
| CYLD        | c.2678-18T>C               |            |            |            |            |            |            |            |            |            |            |            |            | 1,3%  |
| EP300       | c.3182_3183insA            |            |            |            |            |            |            |            |            |            |            |            |            | 11,5% |
| EP300       | c.4517delG                 |            |            |            |            |            |            |            |            |            | 45,36      |            | 43,95      | 5,1%  |
| EP300       | c.1529-20G>A               |            |            |            |            |            |            |            |            |            |            |            |            | 1,3%  |
| FAS         | c.677-19_677-18insT        |            |            |            |            |            |            |            |            |            |            |            |            | 3,8%  |
| FAS         | c.641_642insC              |            |            |            |            |            |            |            |            |            |            |            |            | 2,6%  |
| LCP1        | c.491+60T>C                |            |            |            |            |            |            |            |            |            |            |            |            | 2,6%  |
| LCP1        | c.1172A>G                  |            |            |            |            |            |            |            |            |            |            |            |            | 1,3%  |
| LOC10012849 | c.2170A>G                  |            |            |            |            |            |            |            |            |            |            |            |            | 1,3%  |
| LOC10012849 | c.3061G>A                  |            |            |            |            |            |            |            |            |            |            |            |            | 1,3%  |
| LOC10012849 | c.2897C>T                  |            |            |            |            |            |            |            |            |            |            |            |            | 1,3%  |
| MYB         | c.545A>G                   | 5,65       |            |            | 8,25       |            |            |            |            |            | 7,90       |            |            | 9,0%  |
| MYB         | c.528-5T>C                 |            |            |            |            |            |            |            |            |            |            |            |            | 1,3%  |
| MYC         | c.593C>T                   |            |            |            |            |            |            |            |            |            |            |            |            | 1,3%  |
| NOTCH1      | c.6521A>G                  |            |            |            |            |            |            |            |            |            |            |            |            | 2,6%  |
| NOTCH1      | c.4348G>A                  |            |            |            |            |            |            |            |            |            |            |            |            | 2,6%  |
| NOTCH1      | c.383G>A                   |            |            |            |            |            |            |            |            |            |            |            |            | 1,3%  |
| NOTCH1      | c.1978G>A                  |            |            |            |            |            |            |            |            |            |            |            |            | 1,3%  |
| NOTCH1      | c.218C>T                   |            |            |            |            |            |            |            |            |            |            |            |            | 1,3%  |
| NOTCH1      | c.1477G>A                  |            |            |            |            |            |            |            |            |            |            |            |            | 1,3%  |
| NUMA1       | c.5654G>A                  |            |            |            |            |            |            |            |            |            |            |            |            | 1,3%  |
| PIK3CD      | c.931-9G>C                 |            |            |            |            |            |            |            |            |            |            | 44,73      | 53,21      | 7,7%  |
| PIK3CD      | c.931-14_931-13insC        |            |            |            |            |            |            |            |            |            |            | 43,75      | 51,93      | 5,1%  |
| PTPN1       | c.702+56delG               |            |            |            |            |            |            |            |            |            | 30,27      | 38,45      | 39,10      | 3,8%  |
| PTPN1       | c.1089-51C>T               |            |            |            |            |            |            |            |            |            |            |            |            | 1,3%  |
| REL         | c.133C>T                   |            |            |            |            |            |            |            |            |            |            |            |            | 1,3%  |
| RET         | c.2233C>T                  |            |            |            |            |            |            |            |            |            |            |            |            | 1,3%  |
| SH3BP5      | c.330+47C>A                |            |            |            |            |            |            |            |            |            |            |            |            | 2,6%  |
| SH3BP5      | c.330+47_330+48insA        |            |            |            |            |            |            |            |            |            |            |            |            | 1,3%  |
| SH3BP5,SH3B | c.1174A>G                  |            |            |            |            |            |            |            |            |            | 50,43      | 46,25      |            | 2,6%  |
| SMARCA4     | c.1119-12C>T               |            |            |            |            |            |            |            |            |            |            |            |            | 2,6%  |
| SMARCA4     | c.577G>A                   |            |            |            |            |            |            |            |            |            |            |            |            | 1,3%  |
| SMARCA4     | c.2974G>A                  |            |            |            |            |            |            |            |            |            |            |            |            | 1,3%  |
| SMARCA4     | c.3598C>T                  |            |            |            |            |            |            |            |            |            |            |            |            | 1,3%  |
| SOCS1       | c.307_321delGTGCGGACAGCCGC |            |            |            |            |            |            |            |            |            |            |            |            | 1,3%  |
| STAT3       | c.332A>G                   |            |            |            |            |            |            |            |            |            |            |            |            | 1,3%  |
| STAT6       | c.910delG                  |            |            |            |            |            |            |            |            |            |            |            |            | 10,3% |
| STAT6       | c.256-4G>A                 |            |            |            |            |            |            |            |            |            |            |            |            | 2,6%  |
| STAT6       | c.940G>A                   |            |            |            |            |            |            |            |            |            |            |            |            | 2,6%  |
| STAT6       | c.1513-20C>T               |            |            |            |            |            |            |            |            |            |            |            |            | 1,3%  |
| STAT6       | c.1876C>T                  |            |            |            |            |            |            |            |            |            |            |            |            | 1,3%  |
| STAT6       | c.681-7G>A                 |            |            |            |            |            |            |            |            |            |            |            |            | 1,3%  |
| TNFAIP3     | c.1018_1021delAATC         |            |            |            |            |            |            |            |            |            |            |            |            | 2,6%  |
| TNFAIP3     | c.131A>T                   |            |            |            |            |            |            |            |            |            |            |            |            | 2,6%  |
| TNFAIP3     | c.487-11G>T                |            |            |            |            |            |            |            |            |            |            |            |            | 2,6%  |
| TNFAIP3     | c.1343G>A                  |            |            |            |            |            |            |            |            |            |            |            |            | 1,3%  |
| TP53        | c.215C>G                   |            |            |            |            |            |            |            |            |            |            |            |            | 6,4%  |
| TP53        | c.97-6C>T                  |            |            |            |            |            |            |            |            |            |            |            |            | 5,1%  |
| TP53        | c.97-52G>A                 |            |            |            |            |            |            |            |            |            |            |            |            | 2,6%  |
| TP53        | c.524G>A                   |            |            |            |            |            |            |            |            |            |            |            |            | 2,6%  |
| TP53        | c.473G>A                   |            |            |            |            |            |            |            |            |            |            |            |            | 1,3%  |
| TP53        | c.818G>C                   |            |            |            |            |            |            |            |            |            |            |            |            | 1,3%  |
|             | SNVs                       | 1          | 0          | 1          | 2          | NA         | NA         | 0          | 0          | 2          | 4          | 3          | 5          |       |

| GENE        | CODING                     |            |            |            |            |            |                                          |            |            | % |       |
|-------------|----------------------------|------------|------------|------------|------------|------------|------------------------------------------|------------|------------|---|-------|
|             |                            | BR200035_1 | BR200035_2 | BR210038_1 | BR210038_2 | BR200029_1 | BR200029_2                               | BR180001_1 | BR180001_2 |   |       |
| ABL1        | c.3020C>T                  |            | NA         |            |            |            |                                          |            |            |   | 1,3%  |
| B2M         | c.347-1G>T                 |            |            |            |            |            |                                          |            |            |   | 2,6%  |
| B2M         | c.41_44delCTCT             |            |            |            |            |            |                                          |            |            |   | 1,3%  |
| B2M         | c.64C>T                    |            |            |            |            |            |                                          |            |            |   | 1,3%  |
| B2M         | c.67C>T                    |            |            |            |            |            |                                          |            |            |   | 1,3%  |
| B2M         | c.67+5G>C                  |            |            |            |            |            |                                          |            |            |   | 1,3%  |
| BCL10       | c.521T>A                   |            |            |            |            |            |                                          |            |            |   | 2,6%  |
| CARD11      | c.1017+99T>C               |            |            |            |            |            |                                          |            |            |   | 10,3% |
| CARD11      | c.1940+81G>A               |            |            |            |            |            |                                          |            |            |   | 2,6%  |
| CARD11      | c.1864_1866delTCC          |            |            |            |            |            |                                          |            |            |   | 1,3%  |
| CARD11      | c.1599_1600insT            |            |            | 46,69      |            |            |                                          |            |            |   | 1,3%  |
| CARD11      | c.3274C>T                  |            |            |            |            |            |                                          |            |            |   | 1,3%  |
| CASP8       | c.1357C>G                  |            |            |            |            |            |                                          |            |            |   | 2,6%  |
| CASP8       | c.151+3G>A                 |            |            |            |            |            |                                          |            |            |   | 2,6%  |
| CD19        | c.1267A>G                  |            |            |            |            |            |                                          |            |            |   | 1,3%  |
| CD38        | c.652A>T                   |            |            |            |            |            |                                          |            |            |   | 1,3%  |
| CREBBP      | c.6980C>T                  |            |            |            |            |            |                                          |            |            |   | 2,6%  |
| CREBBP      | c.6877C>T                  |            |            |            |            |            |                                          |            |            |   | 1,3%  |
| CREBBP      | c.5173-20T>C               |            |            |            |            |            |                                          |            |            |   | 1,3%  |
| CREBBP      | c.1573+11G>T               |            |            |            |            |            |                                          |            |            |   | 1,3%  |
| CSF1R       | c.241A>G                   |            |            |            |            |            |                                          |            |            |   | 2,6%  |
| CSF1R       | c.726_727insT              |            |            |            |            |            |                                          |            |            |   | 2,6%  |
| CSF1R       | c.2655-49C>T               |            |            |            |            |            |                                          |            |            |   | 1,3%  |
| CSF1R       | c.2113G>A                  |            |            |            |            |            |                                          |            |            |   | 1,3%  |
| CSF1R       | c.1626+3G>A                |            |            |            |            |            |                                          |            |            |   | 1,3%  |
| CSF1R       | c.1969+85C>T               |            |            |            |            |            |                                          |            |            |   | 1,3%  |
| CSF1R       | c.1109G>A                  |            |            |            |            |            |                                          |            |            |   | 1,3%  |
| CSF2        | c.32C>T                    |            |            |            |            |            | 5,95                                     |            |            |   | 1,3%  |
| CSF2RB      | c.553G>A                   |            |            |            |            |            |                                          | 26,30      | 30,10      |   | 2,6%  |
| CSF2RB      | c.855-1G>T                 |            |            |            |            |            | 5,92                                     |            |            |   | 1,3%  |
| CSF2RB      | c.787G>A                   |            |            |            |            |            |                                          |            |            |   | 1,3%  |
| CSF2RB      | c.855-38C>T                |            |            |            |            |            |                                          |            |            |   | 1,3%  |
| CSF2RB      | c.855-35C>T                |            |            |            |            |            |                                          |            |            |   | 1,3%  |
| CYLD        | c.2678-18T>C               |            |            |            |            |            | 7,55                                     |            |            |   | 1,3%  |
| EP300       | c.3182_3183insA            |            |            |            |            | 92,49      | 88,43                                    |            |            |   | 11,5% |
| EP300       | c.4517delG                 |            |            |            |            |            |                                          |            |            |   | 5,1%  |
| EP300       | c.1529-20G>A               |            |            |            |            |            |                                          |            |            |   | 1,3%  |
| FAS         | c.677-19_677-18insT        |            |            |            |            |            |                                          |            |            |   | 3,8%  |
| FAS         | c.641_642insC              |            |            |            |            |            |                                          |            |            |   | 2,6%  |
| LCP1        | c.491+60T>C                |            |            |            |            |            |                                          |            |            |   | 2,6%  |
| LCP1        | c.1172A>G                  |            |            |            |            |            |                                          |            |            |   | 1,3%  |
| LOC10012849 | c.2170A>G                  |            |            |            |            |            | GCCCC=10.28, GCTCT=2.47                  |            |            |   | 1,3%  |
| LOC10012849 | c.3061G>A                  |            |            |            |            |            |                                          |            |            |   | 1,3%  |
| LOC10012849 | c.2897C>T                  |            |            |            |            |            |                                          |            |            |   | 1,3%  |
| MYB         | c.545A>G                   |            |            |            |            |            |                                          |            |            |   | 9,0%  |
| MYB         | c.528-5T>C                 |            |            |            |            |            |                                          |            |            |   | 1,3%  |
| MYC         | c.593C>T                   |            |            |            |            |            |                                          |            |            |   | 1,3%  |
| NOTCH1      | c.6521A>G                  |            |            |            |            |            |                                          |            |            |   | 2,6%  |
| NOTCH1      | c.4348G>A                  |            |            |            |            |            |                                          |            |            |   | 2,6%  |
| NOTCH1      | c.383G>A                   |            |            |            |            |            | 8,25                                     |            |            |   | 1,3%  |
| NOTCH1      | c.1978G>A                  |            |            |            |            |            |                                          |            |            |   | 1,3%  |
| NOTCH1      | c.218C>T                   |            |            |            |            |            |                                          |            |            |   | 1,3%  |
| NOTCH1      | c.1477G>A                  |            |            |            |            |            |                                          |            |            |   | 1,3%  |
| NUMA1       | c.5654G>A                  |            |            |            |            |            |                                          |            |            |   | 1,3%  |
| PIK3CD      | c.931-9G>C                 |            |            |            |            |            |                                          |            |            |   | 7,7%  |
| PIK3CD      | c.931-14_931-13insC        |            |            |            |            |            |                                          |            |            |   | 5,1%  |
| PTPN1       | c.702+56delG               |            |            |            |            |            |                                          |            |            |   | 3,8%  |
| PTPN1       | c.1089-51C>T               |            |            |            |            |            |                                          |            |            |   | 1,3%  |
| REL         | c.133C>T                   |            |            |            |            |            |                                          |            |            |   | 1,3%  |
| RET         | c.2233C>T                  |            |            |            |            |            |                                          |            |            |   | 1,3%  |
| SH3BP5      | c.330+47C>A                |            |            | 54,12      | 54,23      |            |                                          |            |            |   | 2,6%  |
| SH3BP5      | c.330+47_330+48insA        |            |            | 62,69      |            |            |                                          |            |            |   | 1,3%  |
| SH3BP5,SH3B | c.1174A>G                  |            |            |            |            |            |                                          |            |            |   | 2,6%  |
| SMARCA4     | c.1119-12C>T               |            |            |            |            |            |                                          |            |            |   | 2,6%  |
| SMARCA4     | c.577G>A                   |            |            |            |            |            | 8,32                                     |            |            |   | 1,3%  |
| SMARCA4     | c.2974G>A                  |            |            |            |            |            | 8,44                                     |            |            |   | 1,3%  |
| SMARCA4     | c.3598C>T                  |            |            |            |            |            |                                          |            |            |   | 1,3%  |
| SOCS1       | c.307_321delGTGCGGACAGCCGC |            |            |            |            |            |                                          |            |            |   | 1,3%  |
| STAT3       | c.332A>G                   |            |            |            |            |            | 6,82                                     |            |            |   | 1,3%  |
| STAT6       | c.910delG                  |            |            |            |            |            |                                          |            |            |   | 10,3% |
| STAT6       | c.256-4G>A                 |            |            |            |            |            |                                          |            |            |   | 2,6%  |
| STAT6       | c.940G>A                   |            |            |            |            |            |                                          |            |            |   | 2,6%  |
| STAT6       | c.1513-20C>T               |            |            |            |            |            | 6,40                                     |            |            |   | 1,3%  |
| STAT6       | c.1876C>T                  |            |            |            |            |            |                                          |            |            |   | 1,3%  |
| STAT6       | c.681-7G>A                 |            |            |            |            |            |                                          |            |            |   | 1,3%  |
| TNFAIP3     | c.1018_1021delAATC         |            |            |            |            |            |                                          |            |            |   | 2,6%  |
| TNFAIP3     | c.131A>T                   |            |            |            |            |            |                                          |            |            |   | 2,6%  |
| TNFAIP3     | c.487-11G>T                |            |            |            |            |            |                                          |            |            |   | 2,6%  |
| TNFAIP3     | c.1343G>A                  |            |            |            |            |            |                                          |            |            |   | 1,3%  |
| TP53        | c.215C>G                   |            |            |            |            |            | CGCGGGG=51.47, CGCGGTG=1.50, CGGGGA=1.16 |            |            |   | 6,4%  |
| TP53        | c.97-6C>T                  |            |            |            |            |            |                                          | 68,35      | 79,16      |   | 5,1%  |
| TP53        | c.97-52G>A                 |            |            |            |            |            |                                          |            |            |   | 2,6%  |
| TP53        | c.524G>A                   |            |            |            |            |            |                                          |            |            |   | 2,6%  |
| TP53        | c.473G>A                   |            |            |            |            |            | 6,30                                     |            |            |   | 1,3%  |
| TP53        | c.818G>C                   |            |            |            |            |            |                                          |            |            |   | 1,3%  |
|             | SNVs                       | 0          | NA         | 3          | 1          | 2          | 11                                       | 2          | 2          |   |       |



| #CASE    | TISSUE           | SAMPLE ID | ctDNA (pg/ml) | Mean VAF per sample | hGE/mL   | DS (PET/CT) |
|----------|------------------|-----------|---------------|---------------------|----------|-------------|
| LH210011 | Peripheral blood | S_1.2     | 940000        | 0                   | 0        | 1           |
| C191819  | Peripheral blood | S_1.6     | 2200000       | 1.08                | 720000   |             |
| C191819  | Peripheral blood | S_2.0     | 24800000      | 0                   | 0        | 4           |
| C191819  | Peripheral blood | S_4.1     | 12500000      | 0                   | 0        | 5           |
| LH190001 | Peripheral blood | S_0       | 9110000       | 2.20                | 6073333  | 4           |
| LH190001 | Peripheral blood | S_1.2     | 3960000       | 24.50               | 29400000 | 1           |
| LH190001 | Peripheral blood | S_1.3     | 6950000       | 3.70                | 7792424  |             |
| LH190001 | Peripheral blood | S_1.4     | 2510000       | 0                   | 0        | 1           |
| LH210013 | Peripheral blood | S_1.3     | 4960000       | 0                   | 0        | 2           |
| LH210013 | Peripheral blood | S_1.4     | 2050000       | 0                   | 0        | 2           |
| LH210013 | Peripheral blood | S_1.5     | 1310000       | 0                   | 0        | 2           |
| LH210013 | Peripheral blood | S_1.6     | 510000        | 0                   | 0        |             |
| LH210014 | Peripheral blood | S_3.0     | 642000        | 0                   | 0        | 5           |
| LH210012 | Peripheral blood | S_0       | 768000        | 0                   | 0        |             |
| LH210012 | Peripheral blood | S_1.1     | 1580000       | 0                   | 0        | 3           |
| LH210012 | Peripheral blood | S_1.3     | 1980000       | 22.53               | 13518000 |             |
| LH210012 | Peripheral blood | S_1.4     | 169000        | 0                   | 0        | 1           |
| LH200004 | Peripheral blood | S_0       | 1210000       | 34.13               | 12514333 | 5           |
| LH200004 | Peripheral blood | S_2.0     | 1650000       | 3.14                | 1570000  | 4           |
| LH200004 | Peripheral blood | S_2.1     | 3160000       | 9.17                | 8780970  | 5           |
| LH200004 | Peripheral blood | S_2.2     | 4940000       | 11.10               | 16616364 | 4           |
| LH200004 | Peripheral blood | S_2.3*    | 4280000       | 9.24                | 11984000 | 2           |
| LH200004 | Peripheral blood | S_2.6*    | 1830000       | 10.19               | 5650818  | 4           |
| LH200005 | Peripheral blood | S_2.3     | 3910000       | 0                   | 0        | 5           |
| LH200005 | Peripheral blood | S_2.4     | 2010000       | 0                   | 0        | 4           |
| C212118  | Peripheral blood | S_0       | 4450000       | 0                   | 0        | 5           |
| C212118  | Peripheral blood | S_1.2     | 813000        | 0                   | 0        | 2           |
| C212118  | Peripheral blood | S_1.3     | 1740000       | 0                   | 0        |             |
| LH220015 | Peripheral blood | S_0       | 49400000      | 3.08                | 46106667 | 5           |
| LH220015 | Peripheral blood | S_1.1     | 3330000       | 31.85               | 32139545 | 2           |
| LH220015 | Peripheral blood | S_1.3     | 2550000       | 21.03               | 16250455 | 4           |
| LH220015 | Peripheral blood | S_1.4     | 492000        | 20.15               | 3004182  | 4           |
| LH220015 | Peripheral blood | S_1.5     | 925000        | 11.95               | 3349621  |             |
| LH220016 | Peripheral blood | S_0       | 1100000       | 5.92                | 1973333  | 5           |
| LH220016 | Peripheral blood | S_1.1     | 1000000       | 9.39                | 2845455  |             |
| LH220016 | Peripheral blood | S_1.4     | 642000        | 3.76                | 731491   | 5           |
| LH220016 | Peripheral blood | S_1.5     | 1000000       | 0                   | 0        | 2           |
| C222201  | Peripheral blood | S_0       | 4980000       | 18.01               | 27178727 |             |
| C222201  | Peripheral blood | S_1.1     | 1160000       | 0.00                | 0        | 5           |
| C222201  | Peripheral blood | S_1.2     | 1000000       | 21.07               | 4454545  | 3           |
| C222202  | Peripheral blood | S_1.4     | 630000        | 14.70               | 2806364  | 1           |
| LH230118 | Peripheral blood | S_0       | 1180000       | 0                   | 0        | 5           |
| LH230119 | Peripheral blood | S_0       | 2650000       | 5.64                | 4529091  | 5           |
| LH230119 | Peripheral blood | S_1.1_A   | 4850000       | 0.00                | 0        |             |
| LH230119 | Peripheral blood | S_1.1     | 7830000       | 3.20                | 7592727  |             |
| LH230119 | Peripheral blood | S_1.2_A   | 10400000      | 3.70                | 11660606 | 4           |
|          |                  |           |               |                     |          |             |
